# Supplementary material for: Retrospective Evaluation of the Clinical Status of Direct Posterior Composite Restorations in Selected Institutions in Nairobi, Kenya
Source: Research Square preprint supplement (doi:10.21203/rs.3.rs-7991828/v1), 2025-12-22
Supplement: Supplementary file 1 [file 0656ba2db79b1bd9a69a0f95.docx]

APPENDIX I: Modified USPHS-Ryge criteria for clinical evaluation of direct Posterior Resin Composite Restorations.

Modified UHSPS tool

| **COLOR MATCH**  Alpha (A) Visual inspection  The restoration appears to match the shade and translucency of adjacent tooth tissues.  Bravo (B) Visual inspection  The restoration does not match the shade and translucency of adjacent tooth tissues, but the mismatch is within the normal range of tooth shades. (Within normal range: Similar to silicate cement restorations for which the dentist did not quite succeed in matching tooth colour by his choice among available silicate cement shades.)  Charlie (C) Visual inspection  The restoration does not match the shade and translucency of the adjacent tooth structure, and the mismatch is outside the normal range of tooth shades and translucency. | **ANATOMIC CONTOUR**  Alpha (A) Visual inspection and explorer  The restoration is a continuation of existing anatomic form or is slightly flattened. It may be over contoured. When the side of the explorer is placed tangentially across the restoration, it does not touch two opposing cavosurface line angles at the same time.  Bravo (B) Visual inspection and explorer  A surface concavity is evident. When the side of the explorer is placed tangentially across the restoration, it does not touch two opposing cavosurface line angles at the same time, but the dentin or base is not exposed.  Charlie (C) Visual inspection and explorer  There is a loss of restorative substance such that a surface concavity is evident and the base and/or dentin is exposed. |
| --- | --- |
| **CAVOSURFACE MARGINAL DISCOLORATION**  Alpha (A) Visual inspection  There is no visual evidence of marginal discoloration different from the colour of the restorative material and from the colour of the adjacent tooth structure.  Bravo (B) Visual inspection  There is visual evidence of marginal discoloration at the junction of the tooth structure and the restoration, but the discoloration has not penetrated along the restoration in a pulpal direction.  Charlie (C) Visual inspection  There is visual evidence of marginal discoloration at the junction of the tooth structure and the restoration that has penetrated along the restoration in a pulpal direction. | **MARGINAL INTEGRITY**  Alpha (A) Visual inspection and explorer  The explorer does not catch when drawn across the surface of the restoration toward the tooth, or, if the explorer does not catch, there is no visible crevice along the periphery of the restoration.  Bravo (B) Visual inspection and explorer  The explorer catches and there is visible evidence of a crevice, which the explorer penetrates, indicating that the edge of the restoration does not adapt closely to the tooth structure. The dentin and/or the base is not exposed, and the restoration is not mobile.  Charlie (C) Explorer  The explorer penetrates crevice defect extended to the dentino-enamel junction. |
| **SECONDARY CARIES**  Alpha (A) Visual inspection  The restoration is a continuation of existing anatomic form adjacent to the restoration.  Bravo (B) Visual inspection  There is visual evidence of dark keep discoloration adjacent to the restoration (but not directly associated with cavosurface margins). | **SURFACE TEXTURE**  Alpha (A) Explorer   Surface texture similar to polished enamel as determined by means of a sharp explorer.  Bravo (B) Explorer  Surface texture gritty or similar to a surface subject to a white stone or similar to a composite containing supramicron-sized particles.  Charlie (C) Explorer  Surface pitting is sufficiently coarse to inhibit the continuous movement of an explorer across the surface. |
| **GROSS FRACTURE**  Alpha (A) Visual inspection and Explorer  Restoration is intact and fully retained.  Bravo (B) Visual inspection  Restoration is partially retained with some portion of the restoration still intact.  Charlie (C) Visual inspection  Restoration is completely missing. |  |

**Source: Modified from Barnes, D.M. et al (1995): A clinical evaluation of a resin-modified glass ionomer restorative material. J.A.D.A.: 126, 1245–1253, 1995.**
