# Supplementary material for: Retrospective Evaluation of the Clinical Status of Direct Posterior Composite Restorations in Selected Institutions in Nairobi, Kenya
Source: Research Square preprint supplement (doi:10.21203/rs.3.rs-7991828/v1), 2025-12-22
Supplement: Supplementary file 2 [file 25e27dde175aae1a75977985.docx]

## PHOTOGRAPHS FROM THE STUDY


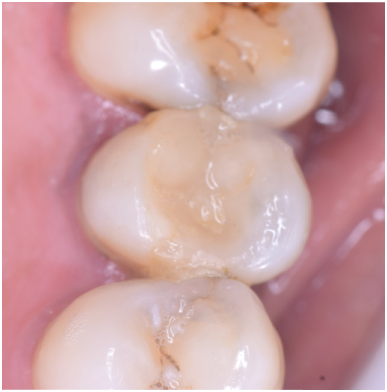

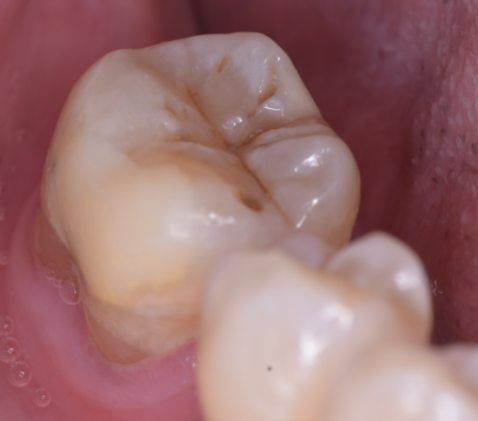

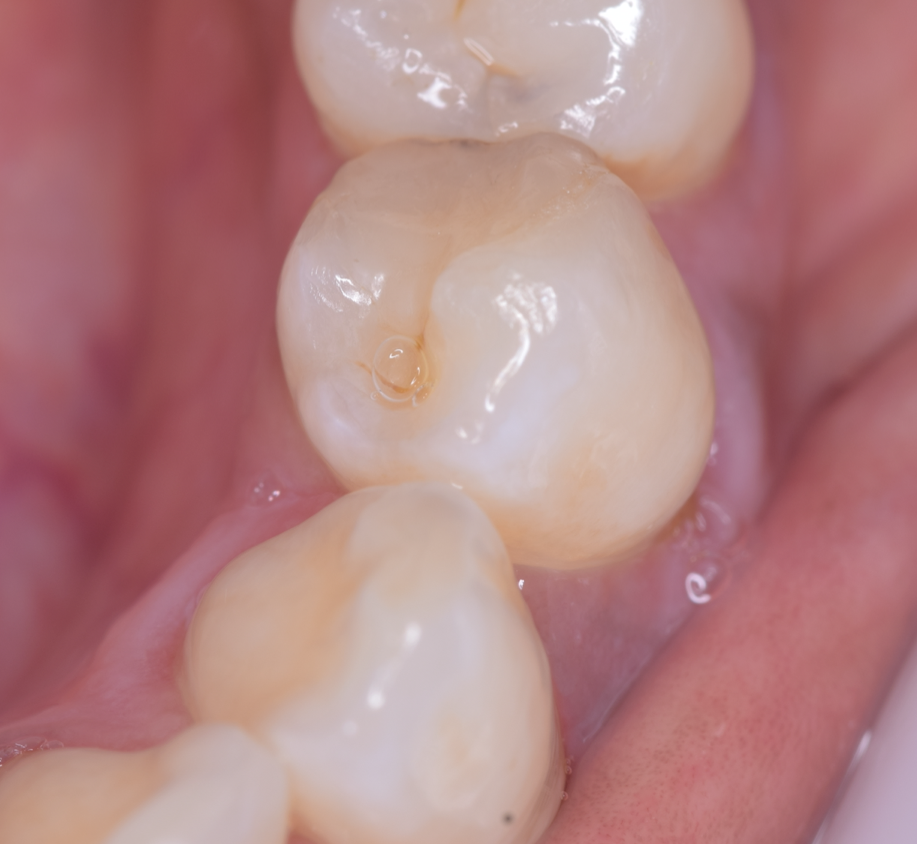


Figure I:Photographs of posteior RCRs that were scored as Alpha


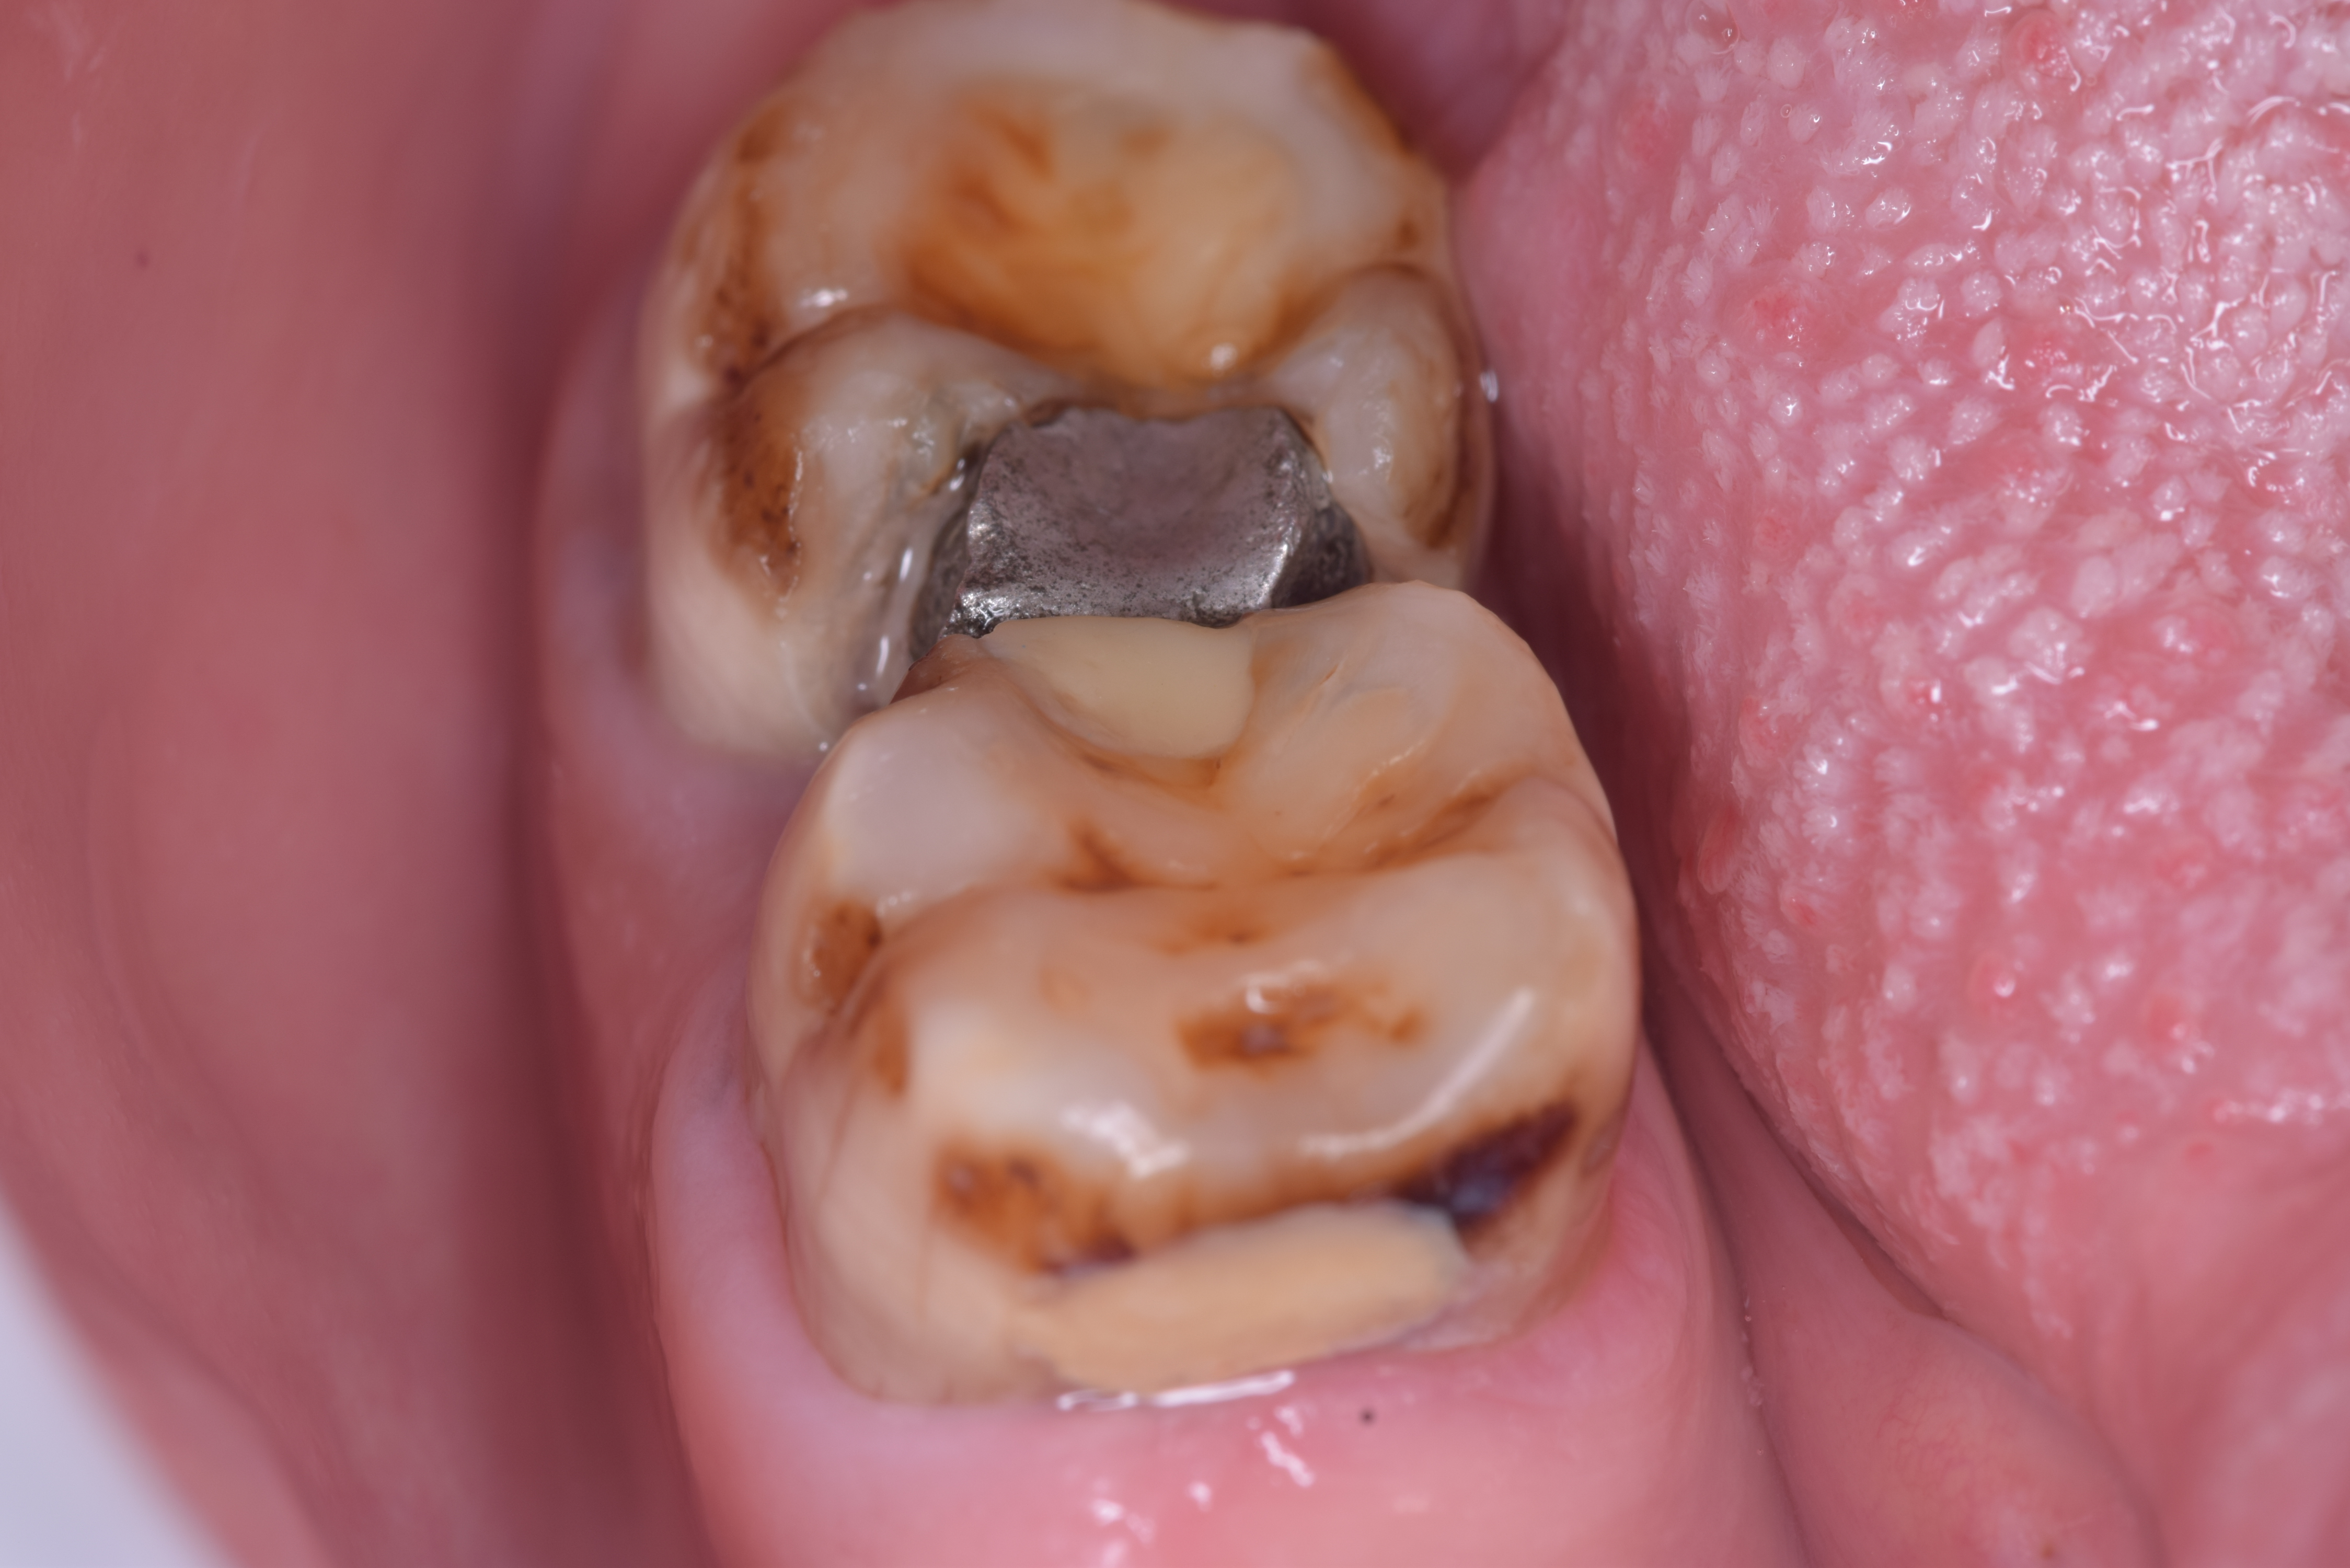

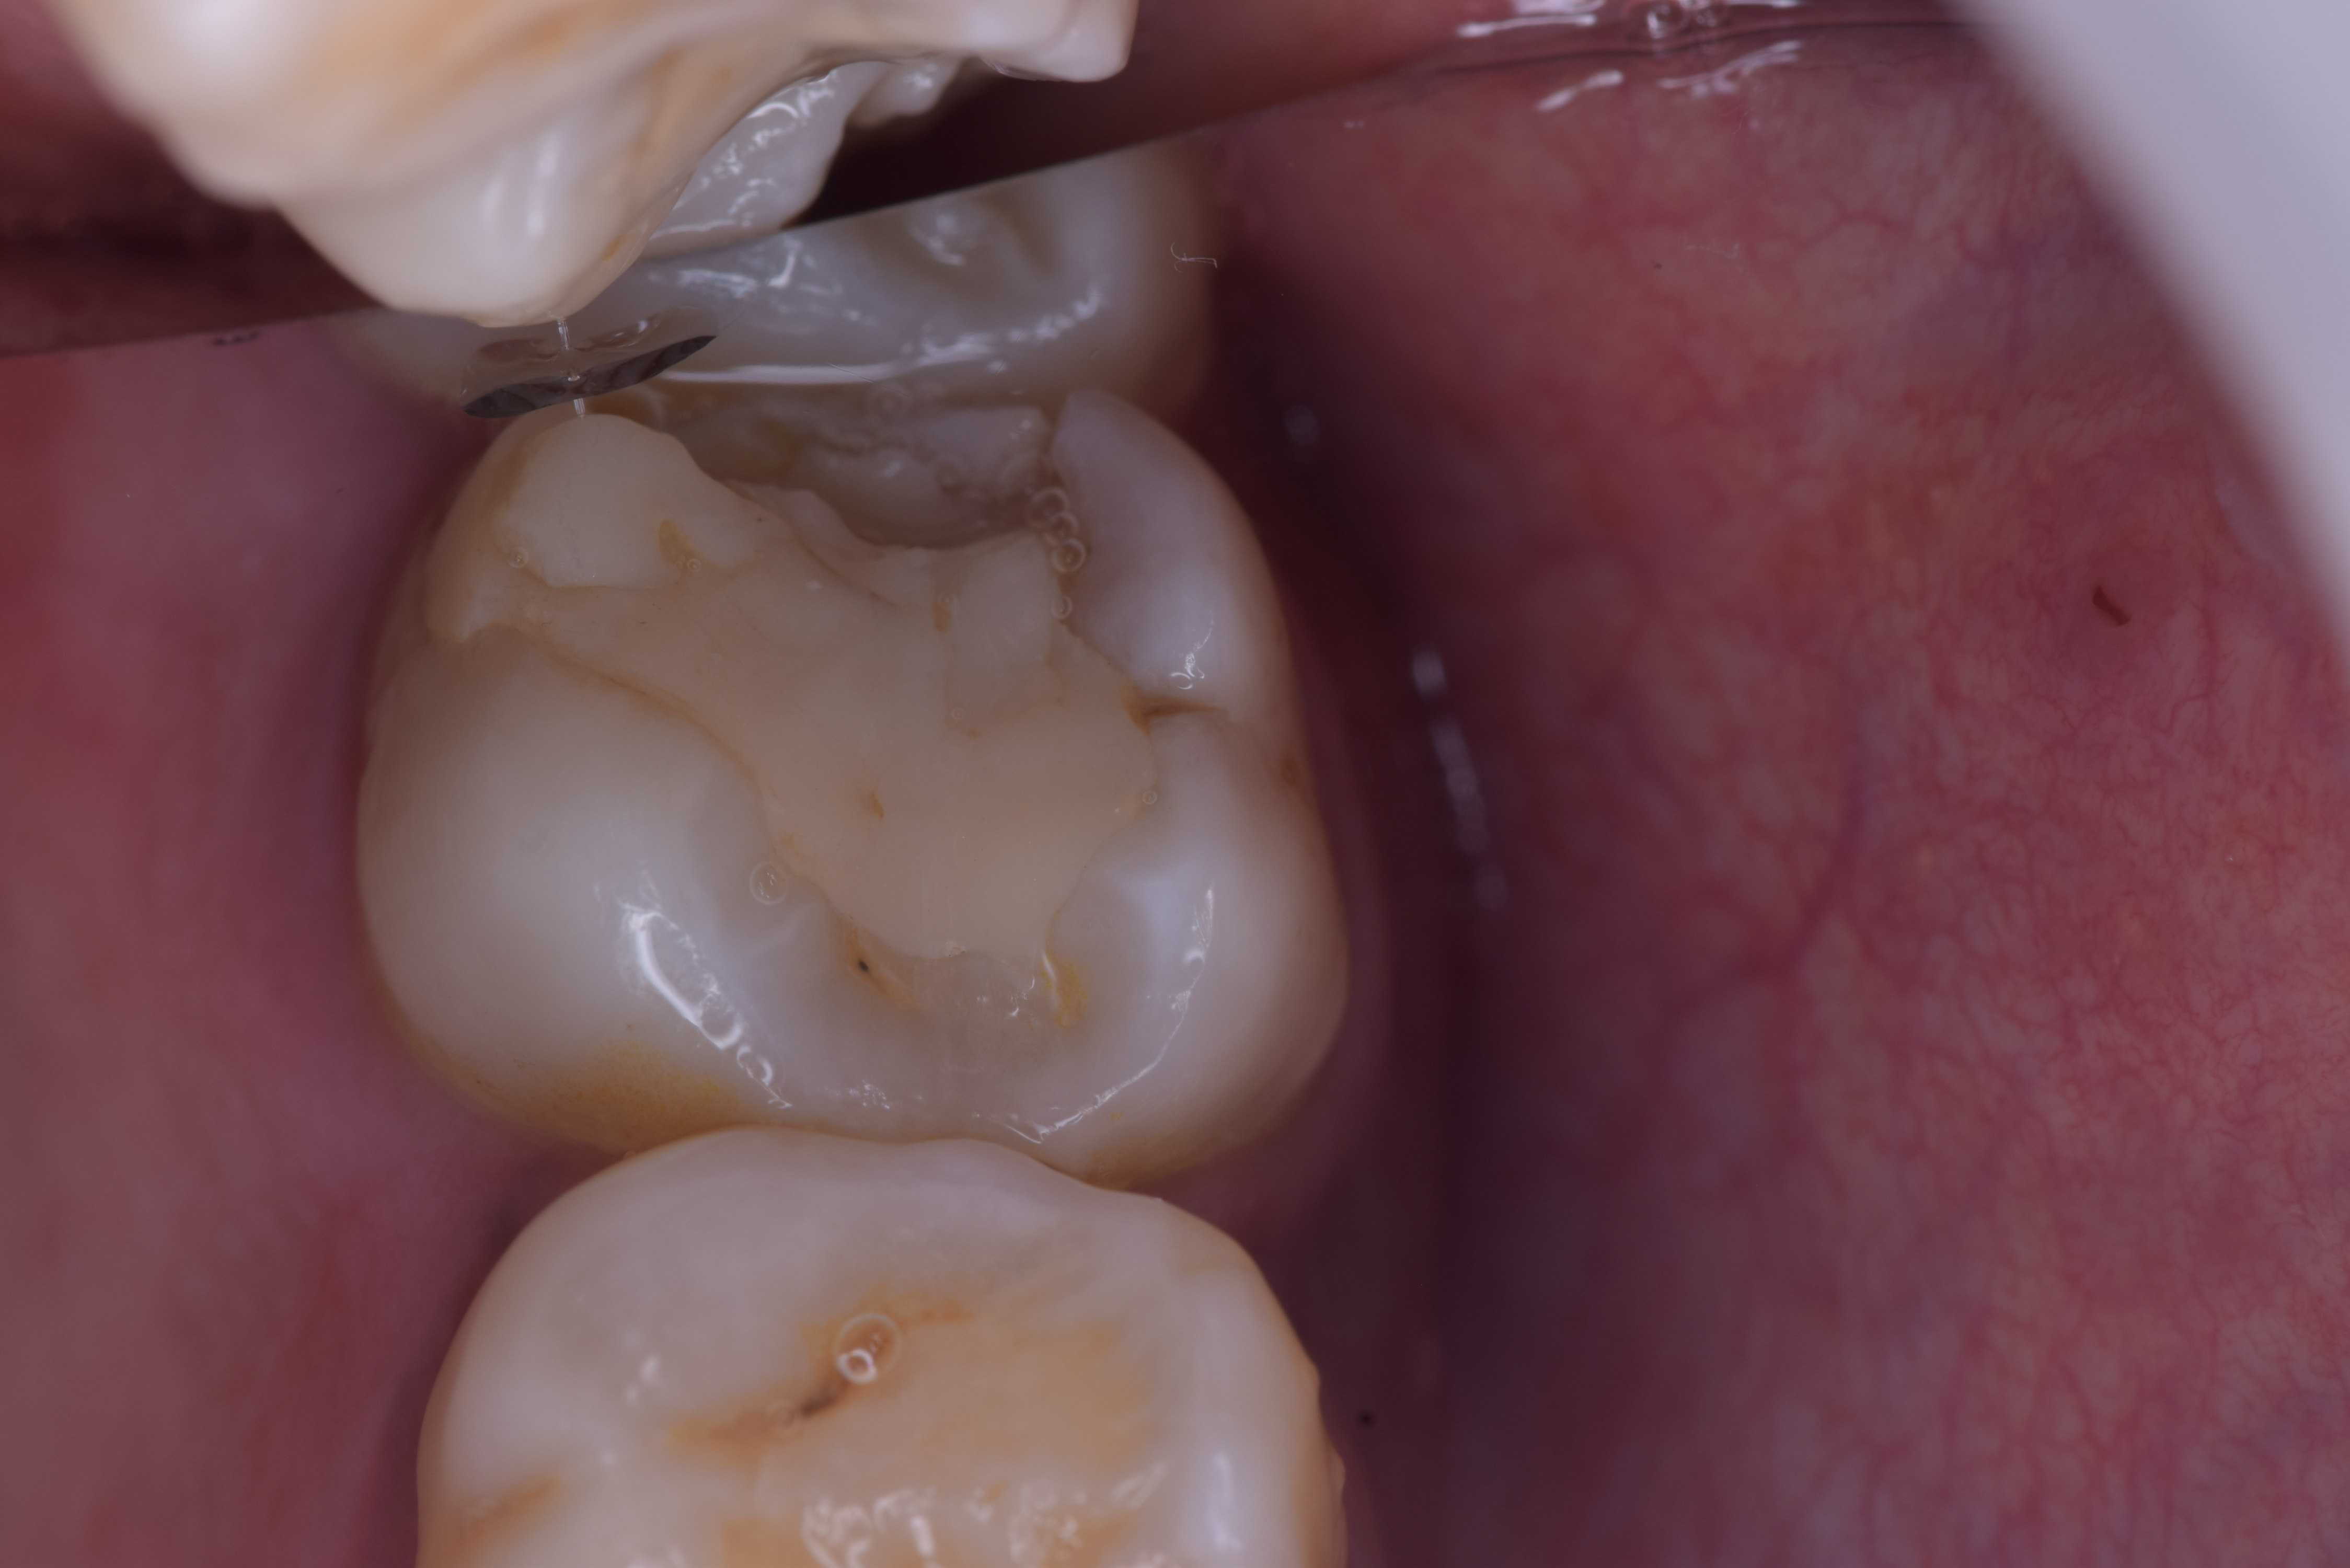

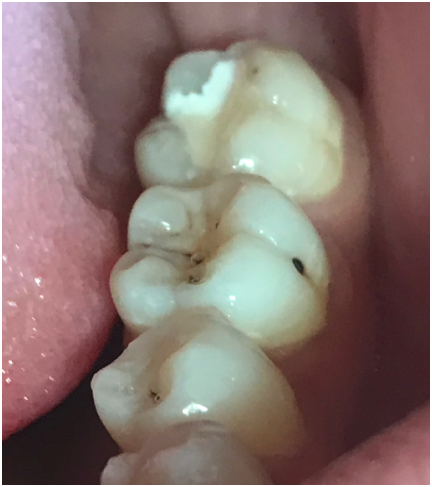


Figure II:Photographs of posterior RCRs that were scored as Bravo
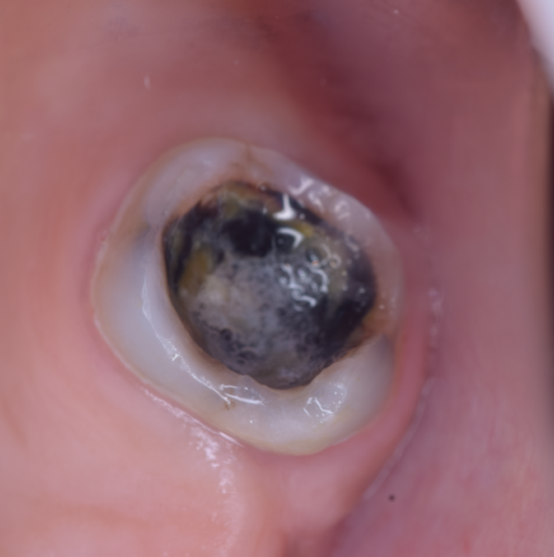

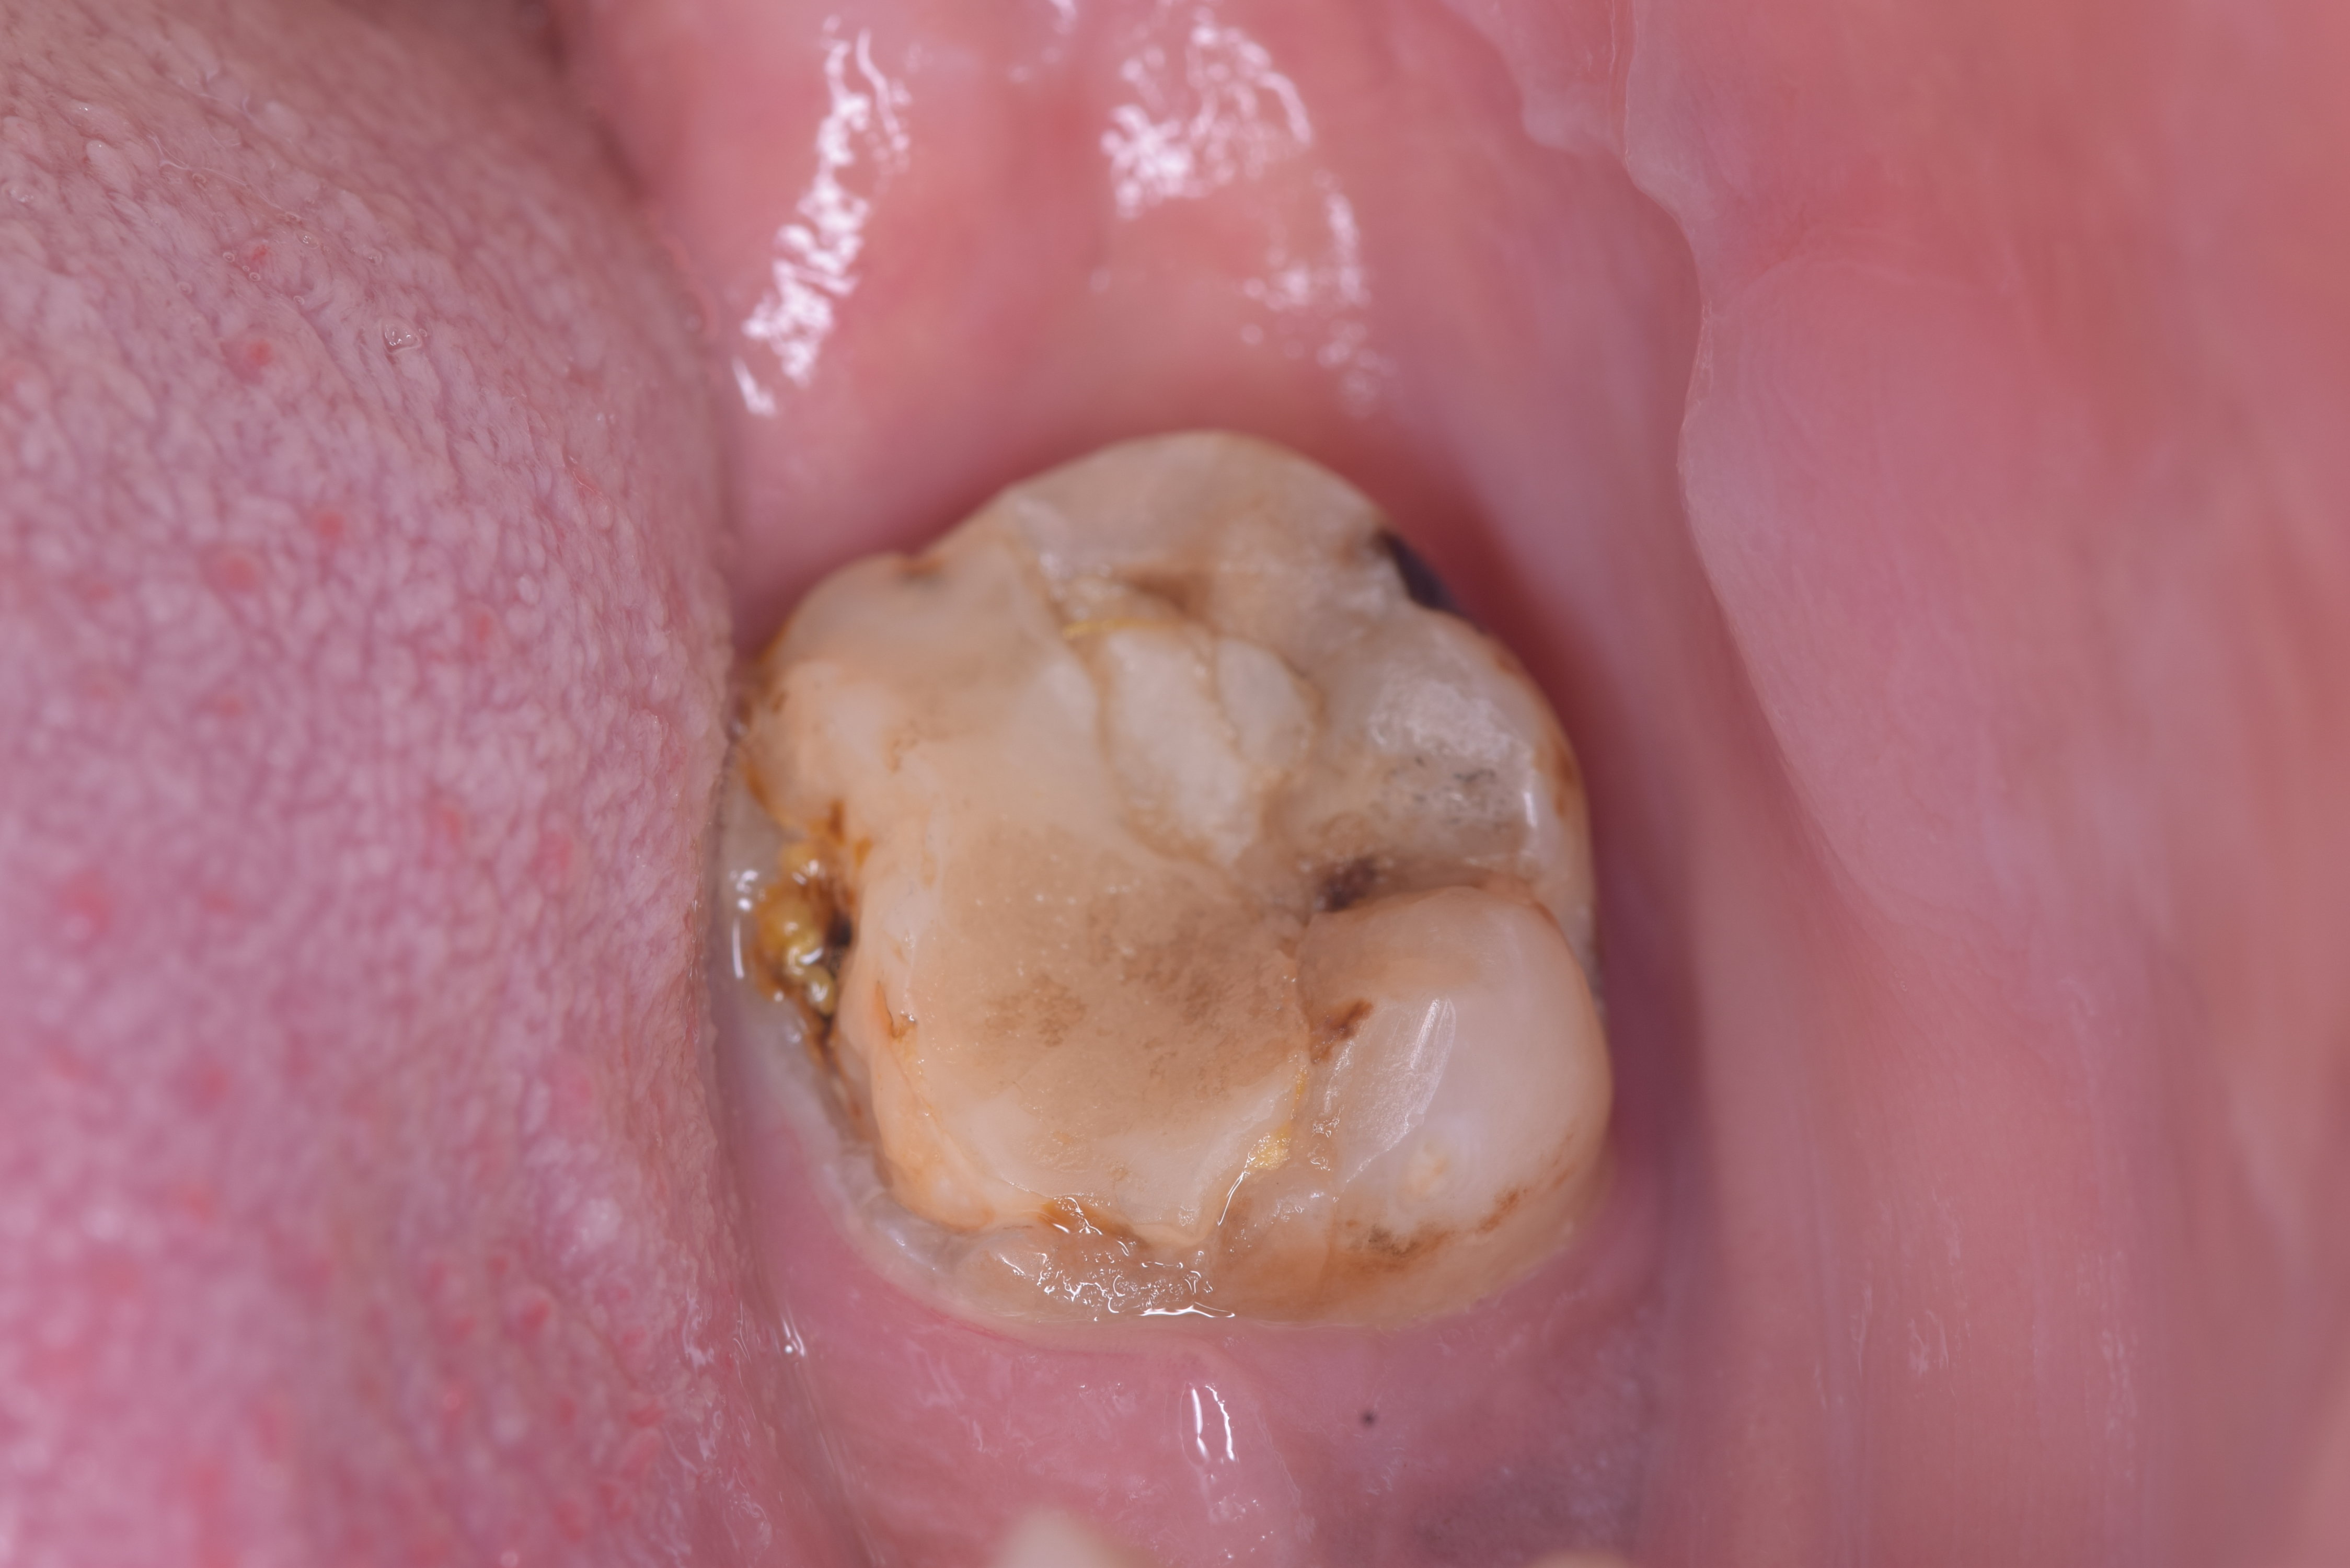

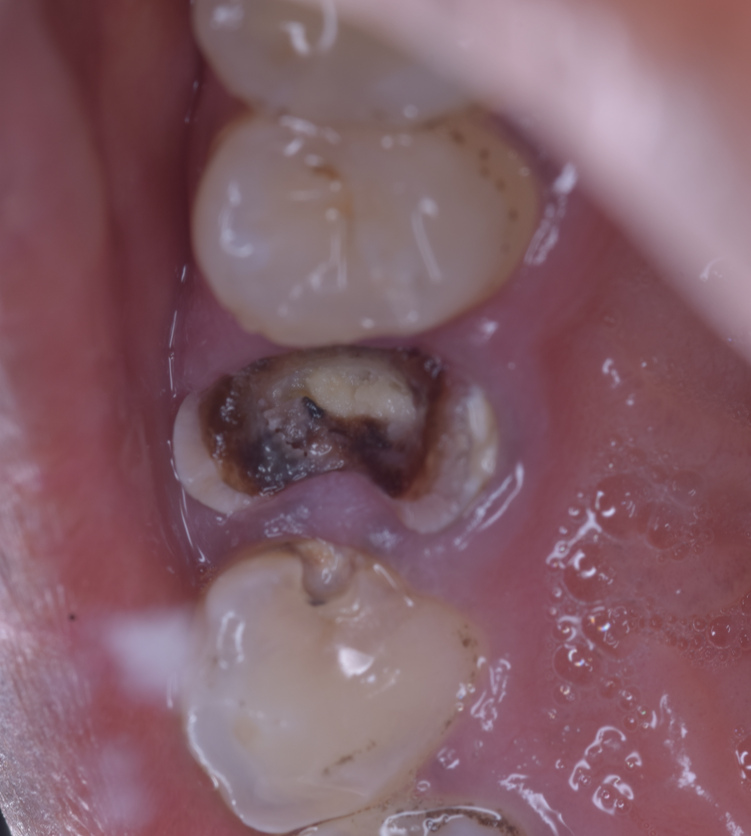


Figure III: Photographs of posteior RCRs that were scored as Charlie


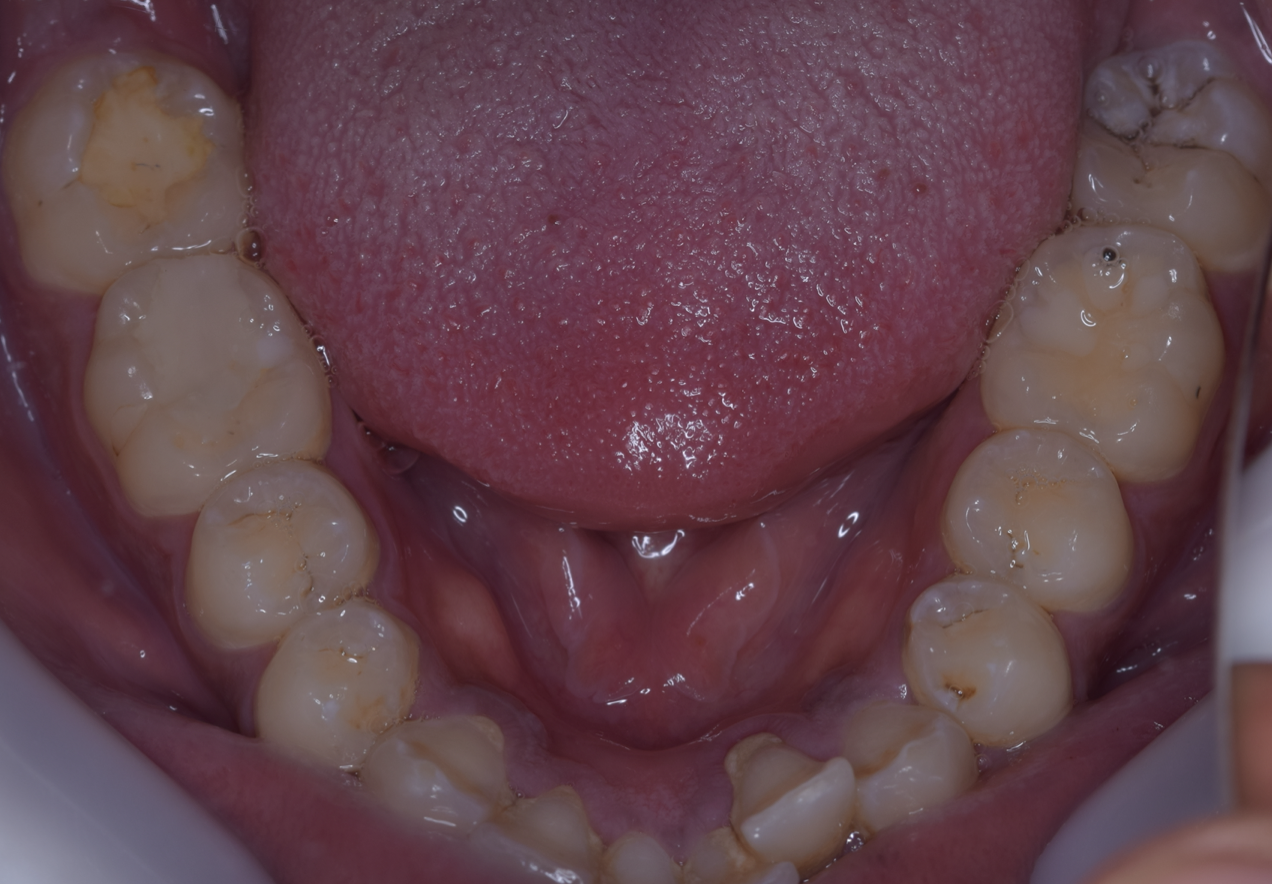

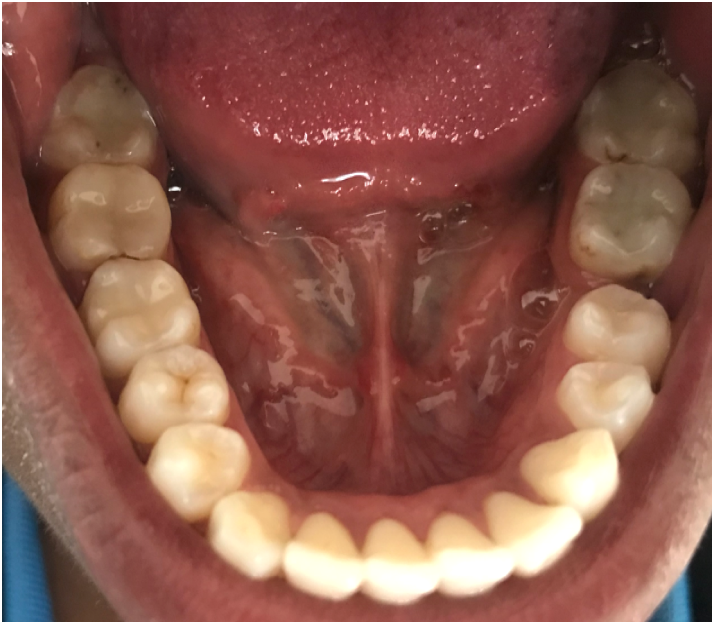


Figure III: Mandibular teeth with posterior RCRs having different USPHS scores


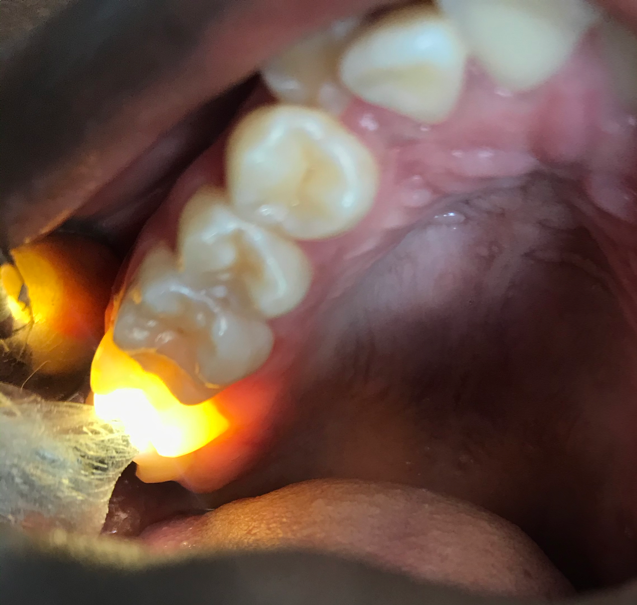

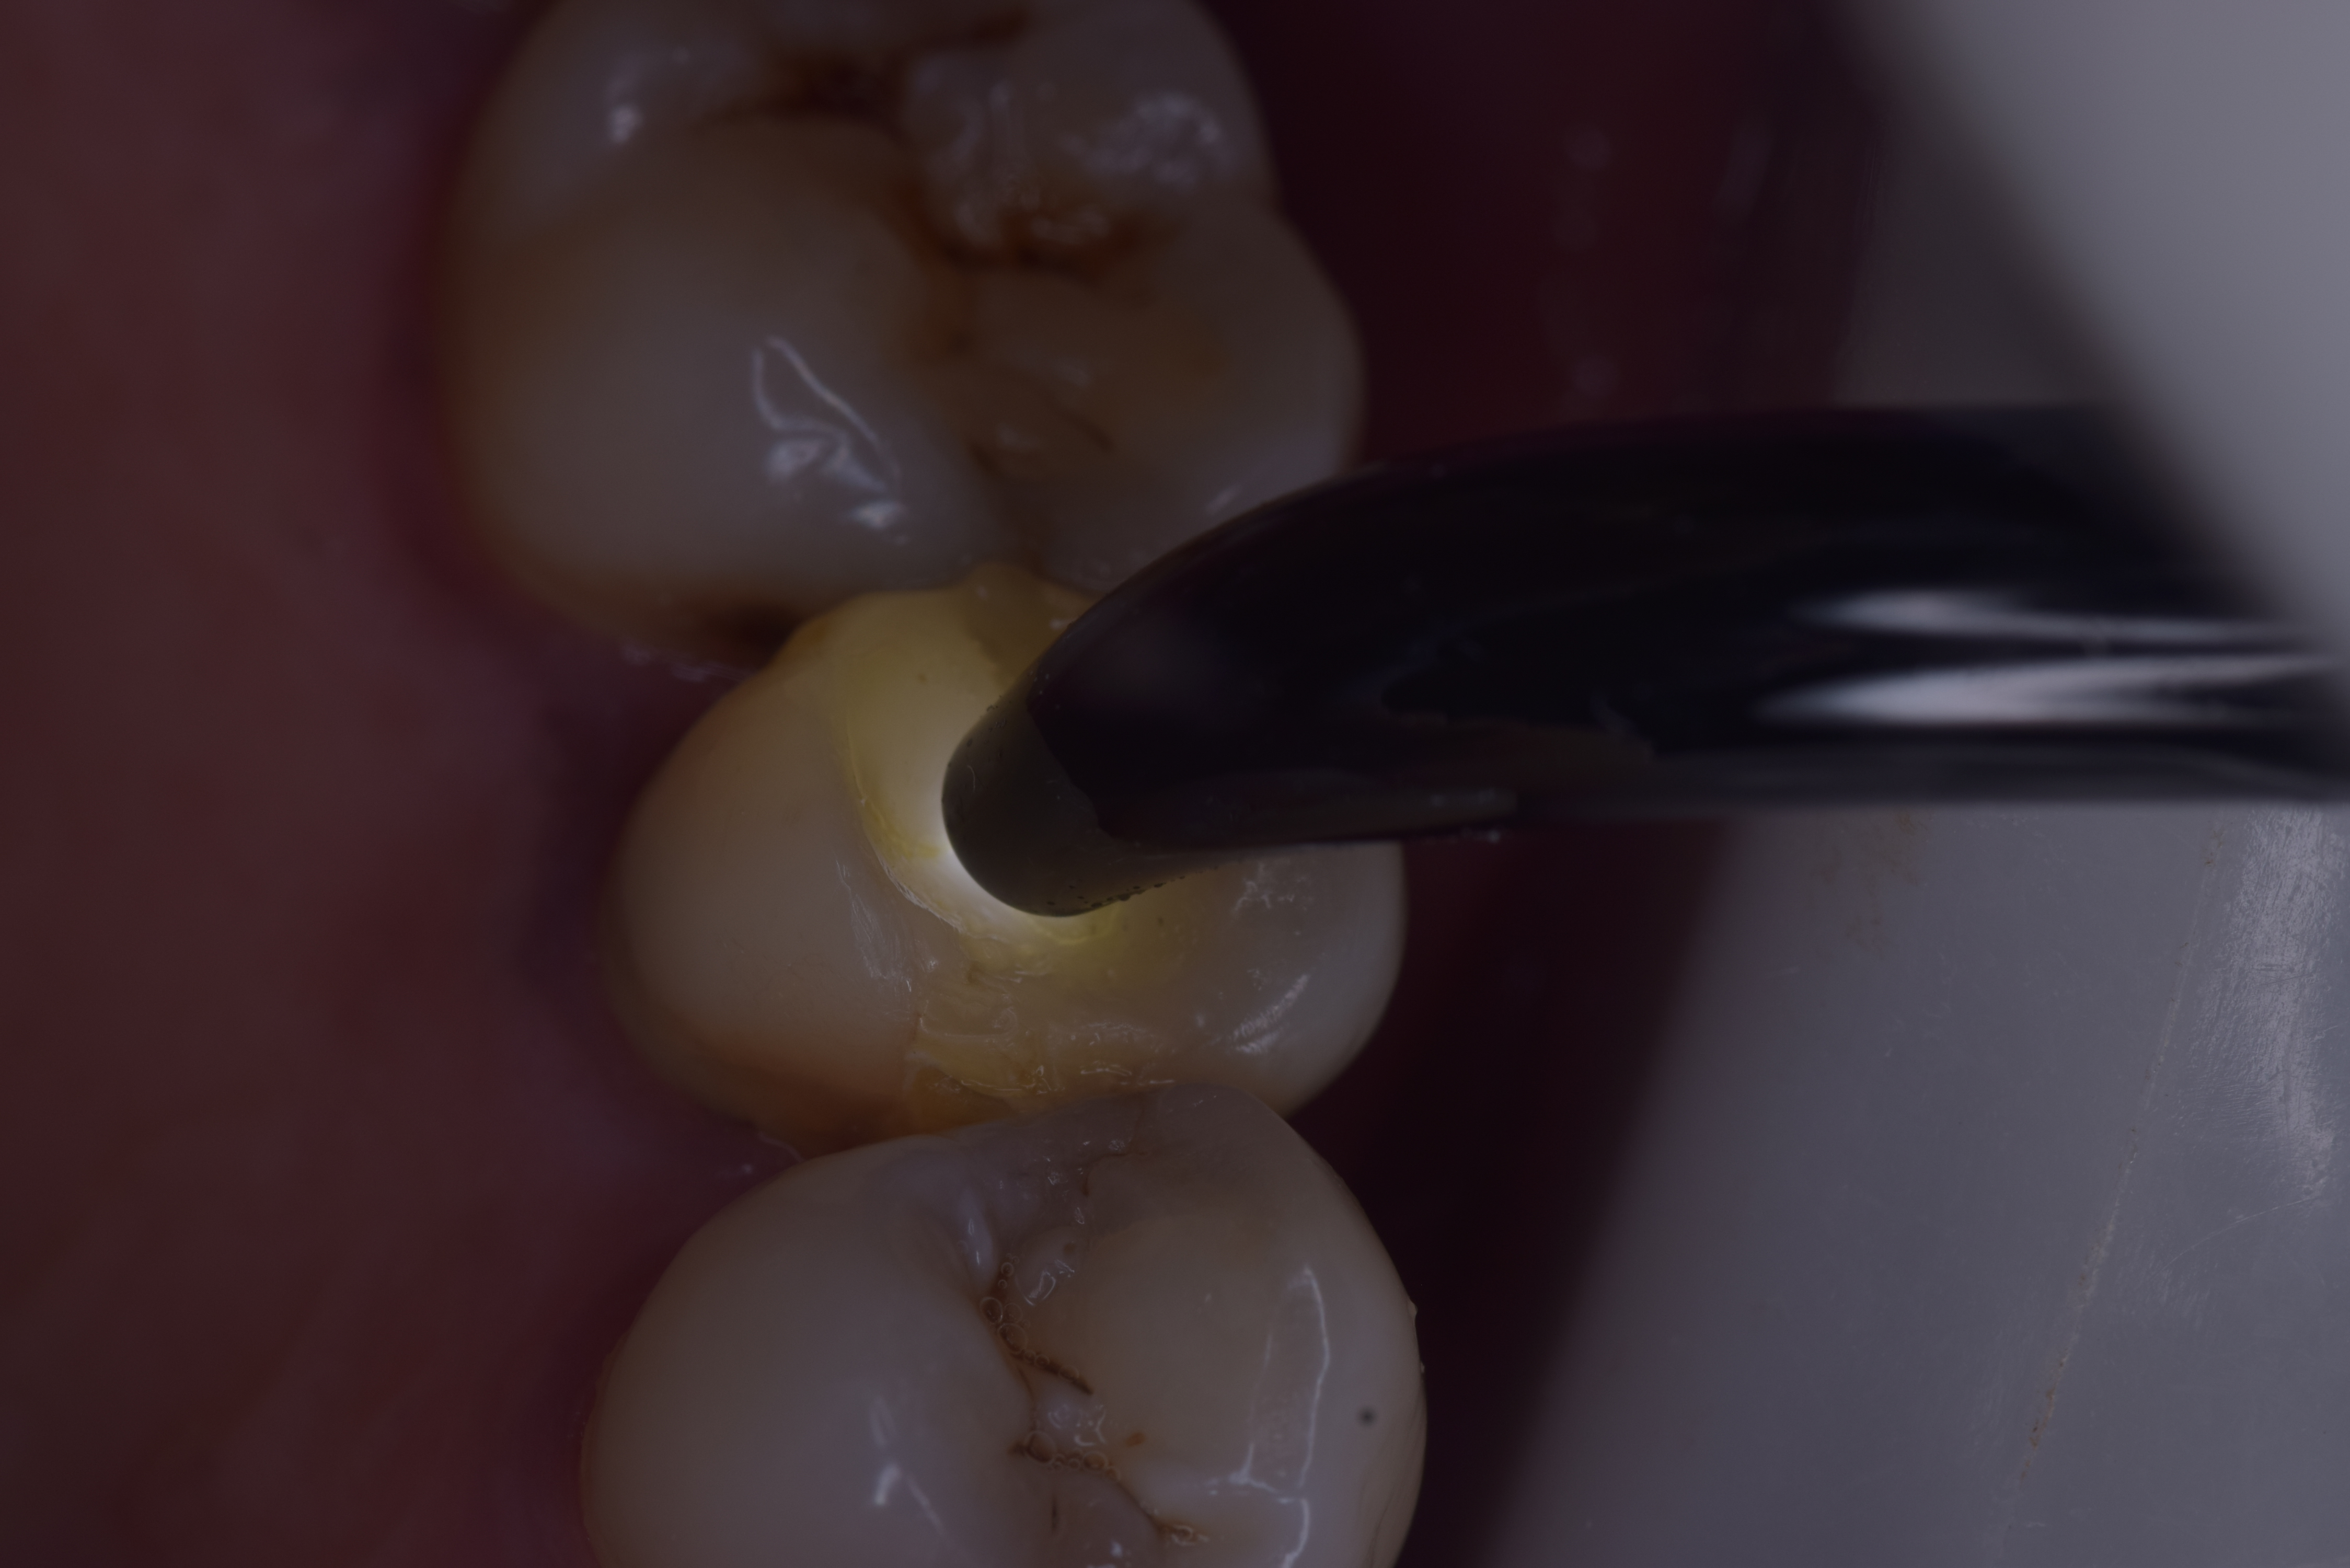

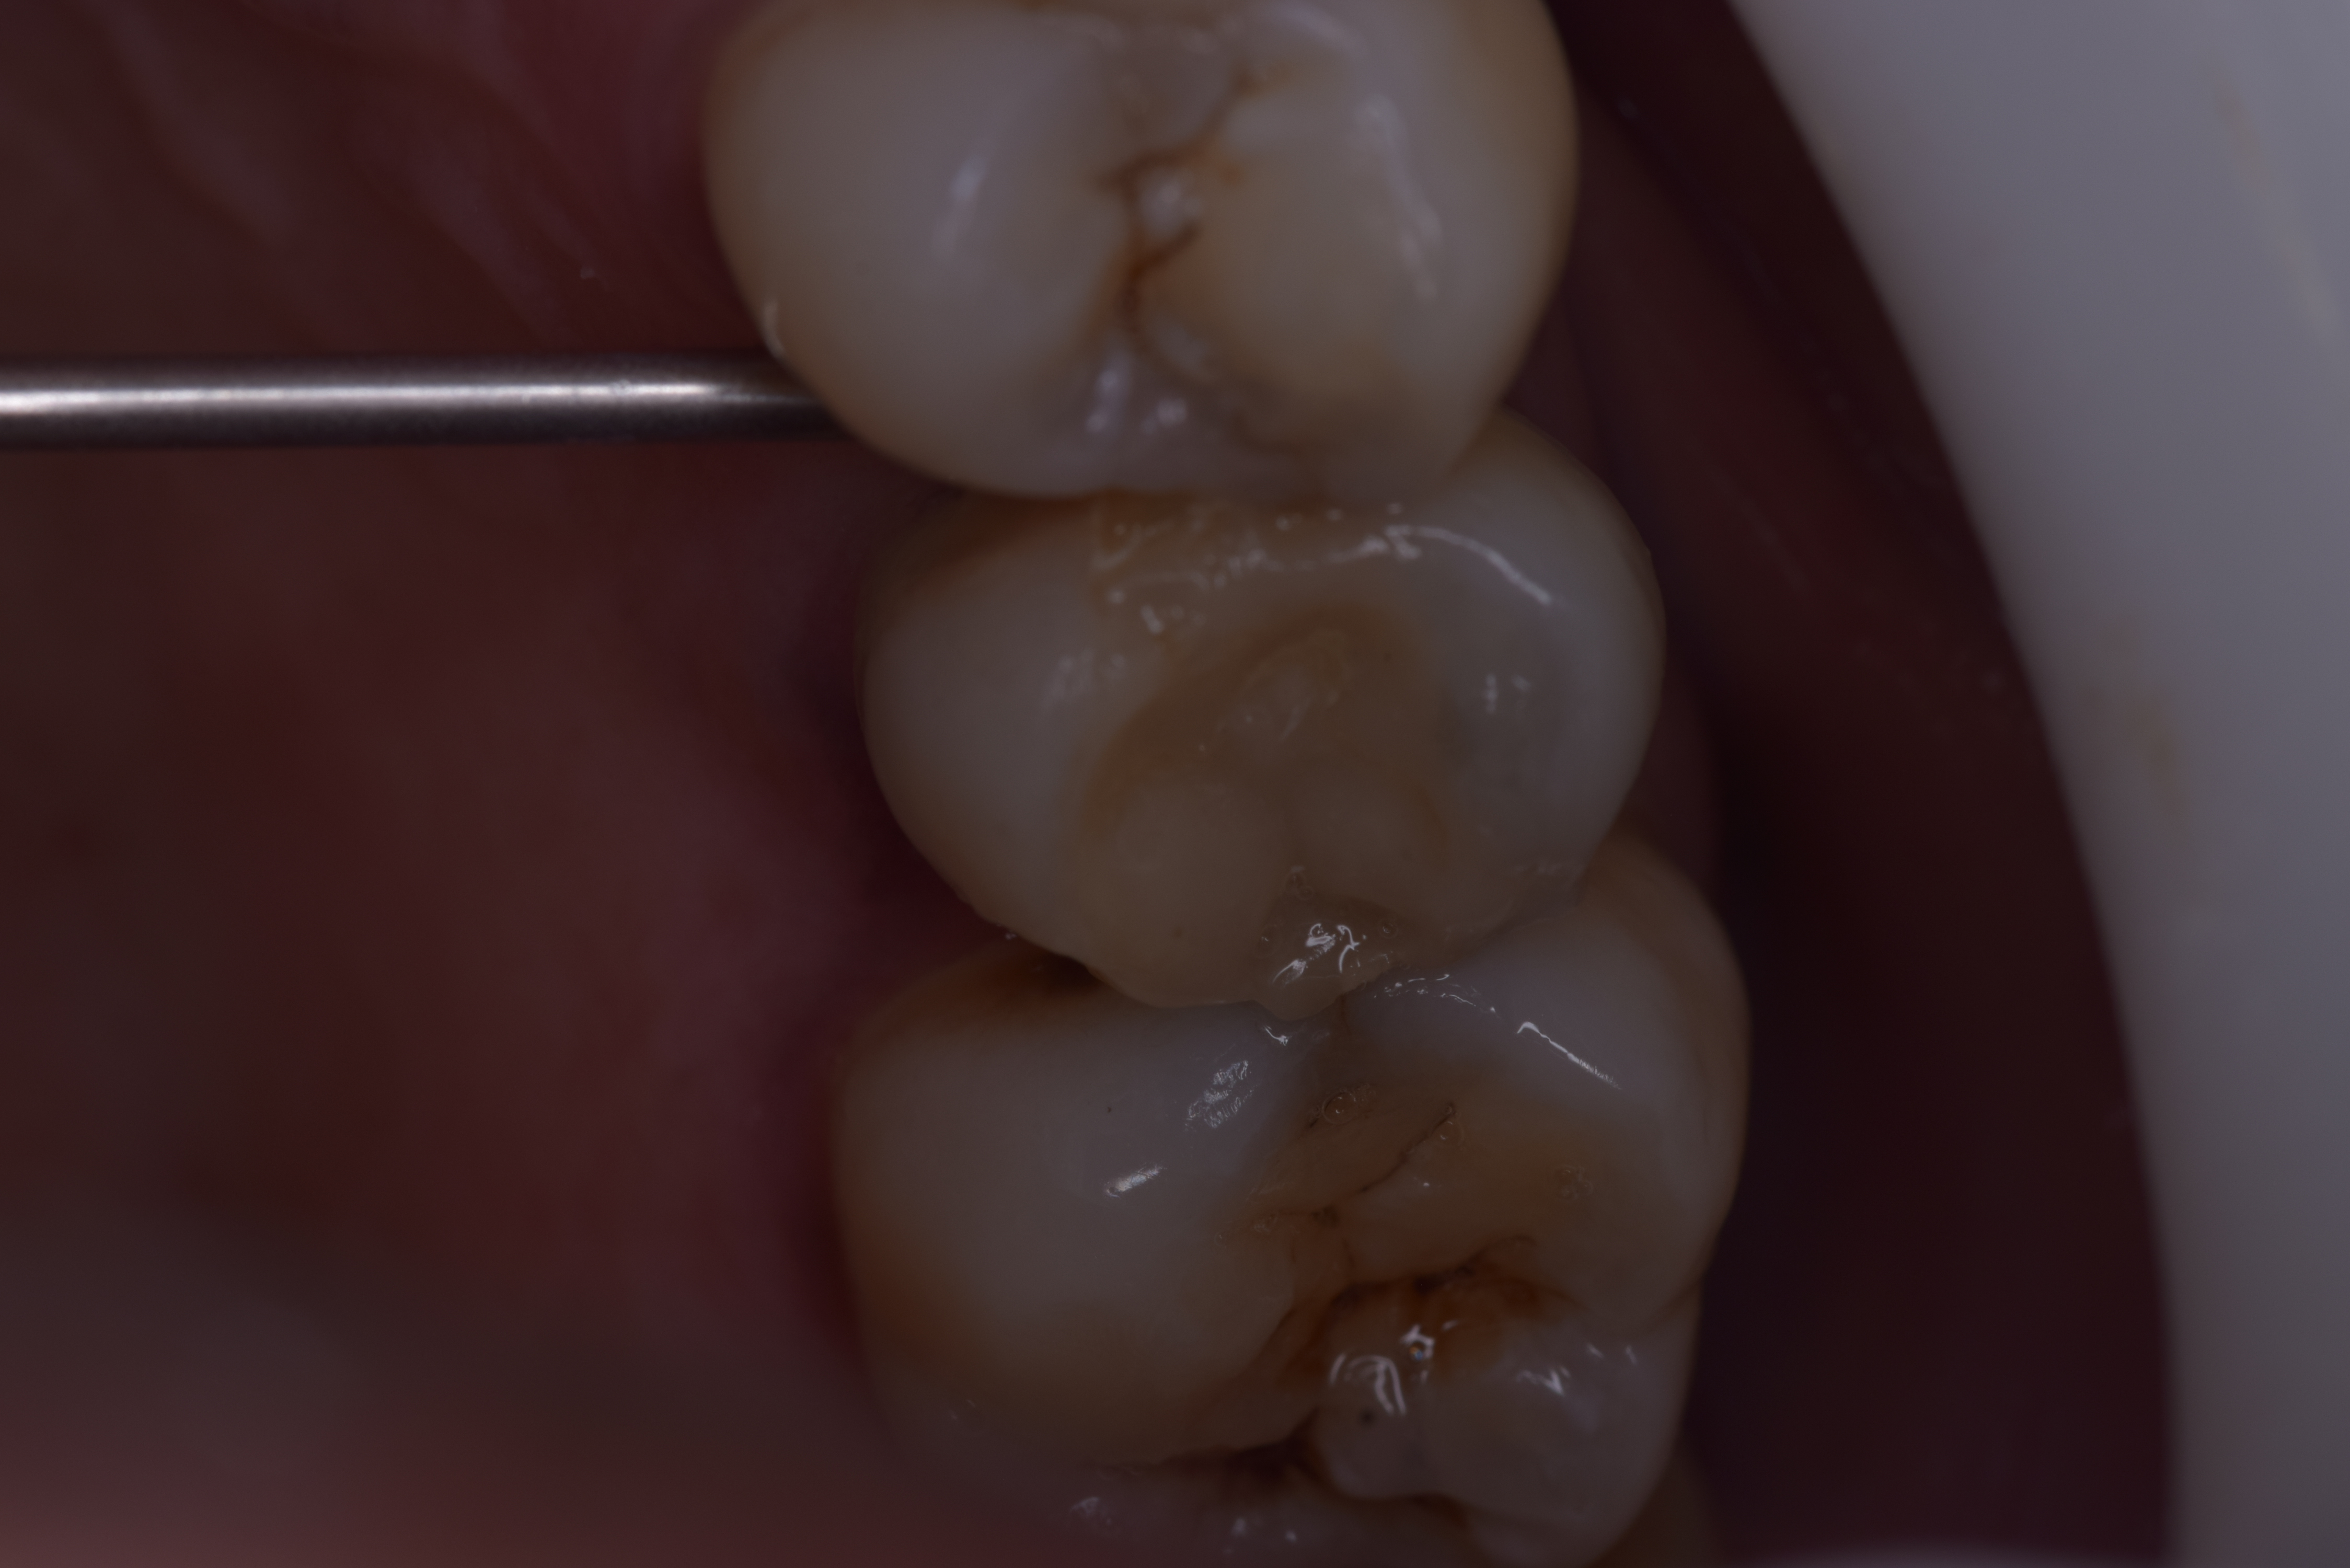


Figure IV : Visualizations of the posterior RCRs using FOTI


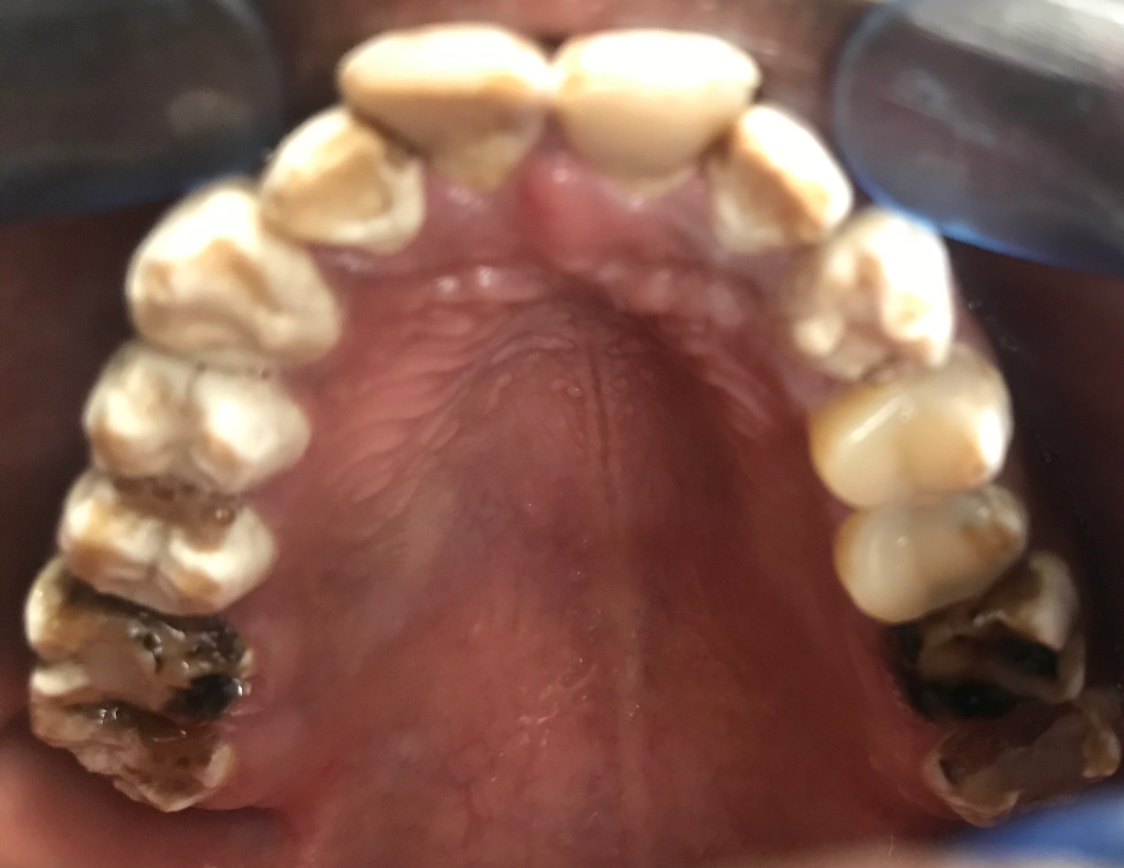

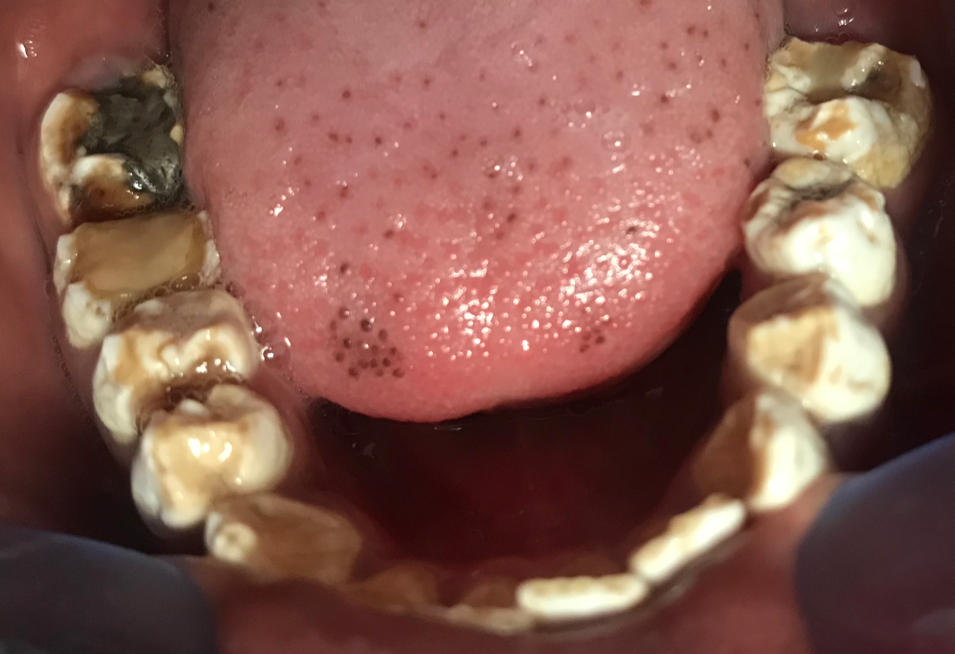


Figure V: Fluoresced teeth with failed RCRs on 16, 36 and 46 and the posterior RCRs with Alpha score on 24 and 25
