# Supplementary material for: Retrospective Evaluation of the Clinical Status of Direct Posterior Composite Restorations in Selected Institutions in Nairobi, Kenya
Source: Research Square preprint supplement (doi:10.21203/rs.3.rs-7991828/v1), 2025-12-22
Supplement: Supplementary file 3 [file 4c5688983e1049d9dfb61929.docx]

APPENDIX I: DATA COLLECTION FORM

FACILITY : ………………………….

PATIENTS’ NAME : ………………………….

REGISTRATION NUMBER :…….…………………….
TELEPHONE CONTACTS : ………………………….

CLINICAL EXAMINATION USING THE USPHS TOOL

1. Dental chart and teeth with direct posterior restorations (amalgam, composites)

Posterior dental restoration chart

| Teeth(Maxilla) | 18 | 17 | 16 | 15 | 14 | 24 | 25 | 26 | 27 | 28 |
| --- | --- | --- | --- | --- | --- | --- | --- | --- | --- | --- |
| Surface involved |  |  |  |  |  |  |  |  |  |  |
| Teeth (Mandible) | 48 | 47 | 46 | 45 | 44 | 34 | 35 | 36 | 37 | 38 |
| Surface involved |  |  |  |  |  |  |  |  |  |  |

1. Teeth with the posterior resin-composite restoration: (Circle)

Posterior resin-composite restoration chart

| Teeth(Maxilla) | 18 | 17 | 16 | 15 | 14 | 24 | 25 | 26 | 27 | 28 |
| --- | --- | --- | --- | --- | --- | --- | --- | --- | --- | --- |
| Surface involved |  |  |  |  |  |  |  |  |  |  |
| Teeth (Mandible) | 48 | 47 | 46 | 45 | 44 | 34 | 35 | 36 | 37 | 38 |
| Surface involved |  |  |  |  |  |  |  |  |  |  |

1. USPHS

USPHS Scores

|  | PARAMETER | TOOTH NUMBER WITH RESTORATION & USPHS SCORES | | | |
| --- | --- | --- | --- | --- | --- |
| 1 | Colour Match |  |  |  |  |
| 2 | Anatomic contour |  |  |  |  |
| 3 | Carvo-surface marginal discoloration |  |  |  |  |
| 4 | Marginal Integrity |  |  |  |  |
| 5 | Secondary caries |  |  |  |  |
| 6 | Surface texture |  |  |  |  |
| 7 | Gross Fracture |  |  |  |  |

1. Proximal tightness using dental floss (Class II only)
   1. Tight 
   2. Loose 
   3. Open 
2. Radiographic evaluation

FOTI investigation

| PARAMETER | TOOTH No. | SURFACE (where applicable) |
| --- | --- | --- |
| Presence of marginal discoloration around the restoration |  |  |
| Presence of Secondary caries using a transilluminator |  |  |

1. Plaque score (Loe and Sillness 1964)

Plaque score

|  | B |  |  | L |  |  | B |  |
| --- | --- | --- | --- | --- | --- | --- | --- | --- |
|  | P |  |  | P |  |  | P |  |
|  | L |  |  | L |  |  | L |  |
|  | B |  |  | L |  |  | B |  |

Overall plaque score = 

1. Other information: …………………………………………….
