# Supplementary material for: Retrospective Evaluation of the Clinical Status of Direct Posterior Composite Restorations in Selected Institutions in Nairobi, Kenya
Source: Research Square preprint supplement (doi:10.21203/rs.3.rs-7991828/v1), 2025-12-22
Supplement: Supplementary file 4 [file adc67bb4374845ebe1e1498e.docx]

APPENDIX I: PARTICIPANT INFORMATION AND CONSENT FORM (ENGLISH

Title of Study: CLINICAL PERFORMANCE OF DIRECT POSTERIOR RESIN-COMPOSITE RESTORATIONS PLACED OVER A 5-YEAR PERIOD SELECTED INSTITUTIONS IN NAIROBI, KENYA.

Principal Investigator: Dr. UMARU KIZITO

University of Nairobi, School of dental Sciences

Introduction:

I would like to tell you about a study being conducted by the above listed researchers. The purpose of this consent form is to give you the information you will need to help you decide whether or not to be a participant in the study. Feel free to ask any questions about the purpose of the research, what happens if you participate in the study, the possible risks and benefits, your rights as a volunteer, and anything else about the research or this form that is not clear. When we have answered all your questions to your satisfaction, you may decide to be in the study or not. This process is called 'informed consent'. Once you understand and agree to be in the study, I will request you to sign your name on this form. You should understand the general principles which apply to all participants in a medical research: i) Your decision to participate is entirely voluntary ii) You may withdraw from the study at any time without necessarily giving a reason for your withdrawal.

1. Refusal to participate in the research will not affect the services you are entitled to in this health facility or other facilities. We will give you a copy of this form for your records.

May I continue? YES / NO

This study has approval by The Kenyatta National Hospital-University of Nairobi Ethics and Research Committee Protocol No**. P760/08/2019**

WHAT IS THIS STUDY ABOUT?

The researchers listed above are interviewing individuals with posterior composite restoration. The purpose of the interview is to find out the **clinical performance of direct resin-composite restorations placed over a 5-year period in selected institutions in Nairobi-Kenya**. Participants in this research study will be asked questions about their oral habits, and perception about these restorations.

There will be approximately **278** restorations in this study randomly chosen. We are asking for your consent to consider participating in this study.

WHAT WILL HAPPEN IF YOU DECIDE TO BE IN THIS RESEARCH STUDY?

If you agree to participate in this study, the following things will happen:

You will be interviewed by a trained interviewer in a private area where you feel comfortable answering questions. The interview will last approximately 30 minutes. The interview will cover topics such as personal and identification details, oral hygiene practices and dental restorations.

After the interview has finished, photographs will be taken for analysis purposes.

We will ask for a telephone number where we can contact you if necessary. If you agree to provide your contact information, it will be used only by people working for this study and will never be shared with others. The reasons why we may need to contact you include: follow up and provision of further treatment if necessary depending on the findings.

ARE THERE ANY RISKS, HARMS DISCOMFORTS ASSOCIATED WITH THIS STUDY?

Medical research has the potential to introduce psychological, social, emotional and physical risks. Effort should always be put in place to minimize the risks. One potential risk of being in the study is loss of privacy. We will keep everything you tell us as confidential as possible. We will use a code number to identify you in a password-protected computer database and will keep all of our paper records in a locked file cabinet. However, no system of protecting your confidentiality can be absolutely secure, so it is still possible that someone could find out you were in this study and could find out information about you.

Also, answering questions in the interview may be uncomfortable for you. If there are any questions you do not want to answer, you can skip them. You have the right to refuse the interview or any questions asked during the interview.

We will do everything we can to ensure that this is done in private. Furthermore, all study staff and interviewers are professionals with special training in these examinations/interviews.

In case of an injury, illness or complications related to this study, contact the study staff right away at the number provided at the end of this document. The study staff will treat you for minor conditions or refer you when necessary.

ARE THERE ANY BENEFITS BEING IN THIS STUDY?

You may benefit by receiving free dental check-up and routine dental x-rays. We will refer you to a hospital for care and support where necessary. Also, the information you provide will help us better understand the resin composite restorations placed in posterior teeth. This information is a contribution to science and formulation of policy in the country.

WILL BEING IN THIS STUDY COST YOU ANYTHING?

It will not cost you anything.

**WILL YOU GET REFUND FOR ANY MONEY SPENT AS PART OF THIS STUDY?**

You will not need to spend any money in this research, but in case you spend money, you will be refunded.

WHAT IF YOU HAVE QUESTIONS IN FUTURE?

If you have further questions or concerns about participating in this study, please call or send a text message to the study staff at the number provided at the bottom of this page.

For more information about your rights as a research participant you may contact the Secretary/Chairperson, Kenyatta National Hospital-University of Nairobi Ethics and Research Committee Telephone No. 2726300 Ext. 44102 email uonknh_erc@uonbi.ac.ke.

The study staff will pay you back for your charges to these numbers if the call is for study-related communication.

WHAT ARE YOUR OTHER CHOICES?

Your decision to participate in research is voluntary. You are free to decline participation in the study and you can withdraw from the study at any time without injustice or loss of any benefits.

CONSENT FORM (STATEMENT OF CONSENT)

Participant’s statement

I have read this consent form or had the information read to me. I have had the chance to discuss this research study with a study counsellor. I have had my questions answered in a language that I understand. The risks and benefits have been explained to me. I understand that my participation in this study is voluntary and that I may choose to withdraw any time. I freely agree to participate in this research study.

I understand that all efforts will be made to keep information regarding my personal identity confidential.

By signing this consent form, I have not given up any of the legal rights that I have as a participant in a research study.

| I agree to participate in this research study: | Yes | No |
| --- | --- | --- |
| I agree to have (define specimen) preserved for later study: | Yes | No |
| I agree to provide contact information for follow-up: | Yes | No |

**Participant printed name:** _________________________________________________________

**Participant signature / Thumb stamp** _______________________**Date** ______________

Researcher’s statement

I, the undersigned, have fully explained the relevant details of this research study to the participant named above and believe that the participant has understood and has willingly and freely given his/her consent.

**Researcher ‘s Name**: **DR. UMARU KIZITO** **Date**: ____________

**Signature**__________________________________________________________________

**Role in the study**: Principal Investigator

For more information contact

1. Dr. Umaru Kizito

School of dental sciences, University of Nairobi.

Cell phone number – 0702140469 Email address- [drkizitoumaru@gmail.com](mailto:drkizitoumaru@gmail.com)

1. Dr. Bernina K Kisumbi

School of Dental sciences, College of Health sciences, University of Nairobi

Cell phone number- 0722487096 Email [address - bkisumbi@uonbi.ac.ke](mailto:address%20-%20bkisumbi@uonbi.ac.ke)

1. Dr. Hazel O Simila

School of Dental sciences, College of Health sciences, University of Nairobi

Cell phone number –0721616044 Email address - [simila@uonbi.ac.ke](mailto:simila@uonbi.ac.ke)

1. Dr. Fred Otieno

School of Dental sciences, College of Health sciences, University of Nairobi

Cell phone number - 0722521010 Email address- [fred.otieno@uonbi.ac.ke](mailto:fred.otieno@uonbi.ac.ke)

KNH/UON-ERC: Tel- 020 726300-9, email address- [uonknh_erc@uonbi.ac.ke](mailto:uonknh_erc@uonbi.ac.ke)

from 08:00 am to 05:00pm, Mon - Fri

APPENDIX II: PARTICIPANT INFORMATION AND CONSENT FORM (SWAHILI)

FOMU YA RIDHAA YA USAJILI WA UTAFITI

Mada ya Utafiti: TATHMINI YA KLINIKI YA MENO YALIYOJAZWA NA RESIN-COMPOSITE KATIKA HOSPITALI ZA MENO ZILIZOCHAGULIWA HUKO NAIROBI, KENYA KUTOKA MYAKA TANO

Mkuu wa uchunguzi na uhusiano wa taasisi: Daktari Umaru Kizito

**Chuo kikuu cha Nairobi**

**Wachunguzi wenza na uhusiano wa taasisi:** Haihusiki

**Utangulizi:**

Ningetaka kukueleza kuhusu utafiti unaofanywa na watafiti ambao wametajwa hapo juu. Lengo la fomu hii ya ridhaa ni kukuwezesha kufanya uamuzi wa iwapo utashiriki katika utafiti au la. Kuwa mwepesi wa kuuliza swali lolote kuhusiana na lengo la utafit, nini hufanyika iwapo utashirikio kwenye utafiti, hatari na manufaa ya utafiti, haki yako kama mtu aliyejitolea kwa hiari na jambo jingine lolote kuhusiana na utafiti au fomu hii ambalo halijaeleweka. Baada ya kuyajibu maswali yako vilivyo, waweza kuamua kushiriki kwenye utafiti au kutoshiriki. Mchakato huu unafahamika kama ‘ridhaa inayofahamika’. Pindi tu utakapoelewa na kukubali kuwa kwenye utafiti, nitaomba ulinakili jina lako na kutia sahihi kwenye fomu hii. Yafaa uelewe sharia za kawaida ambazo hutumiwa na washiriki wote katika utafiti wa kimatibabu: i) Uamuzi wako wa kushiriki ni wa hiari kabisa ii) Waweza kujiondoa kwenye utafiti wakati wowote bila kupatiana sababu ya kufanya hivyo. Iii) Kukataa kushirikio kwenye utafiti hakutaathiri wajibu uanaopaswa kutekeleza katika kituo hiki cha afya ama vituo vinginevyo. Tutakupa nakala ya fomu hii kwa ajili ya rekodi zako

Naweza kuendelea? NDIO / LA

Utafiti huu umeidhinishwa na hospitali ya Kitaifa ya Kenyatta-Kamati ya maadili na utafiti Chuo Kikuu Cha Nairobi, Nambari ya itifaki. **P760/08/2019**

Utafiti huu unahusu nini?

Utafiti huu unanuwia ku**tathmini meno yaliyojazwa na resin-composite katika hospitali za meno zilizochaguliwa huko nairobi, kenya kutoka myaka tano**. Habari nitakazopata ni sehemu ya utafiti wangu wa tasnifu ambayo ni sehemu ya ukamilifu wa shahada ya uzamili katika afya ya meno.

Nitashiriki vipi?

Nitakuuliza maswali kuhusiana na unayofahamu kwenye afya ya kinywa. Nitakiangalia kinywa chako na niyanakili nitakayoyaona. Nitachukua xray na picha ya meno zako. Uchunguzi utafanywa kwa kutumia vifaa safi na hakuna shurutisho litakalofanywa.

**NI NINI KITAKACHOFANYIKA IWAPO UTAAMUA KUWEKO KWENYE UTAFITI?**

Iwapo utakubali kushiriki kwenye utafiti, mambo yafuatayo yatafanyika:

Utahojiwa na mtu ambaye amepitia mafunzo katika mahali pa siri ambapo utaweza kuyajibu maswali. Mahojiano hayo yatachukuwa yapata muda wa dakika thelathini. Mahojiano hayo yatahusisha mada kama vile meno yaliyojazwa, usafi kinywani na ufahamu wa usafi kinywani na jinsi ya kufanya usafi huo.

Tutakuuliza utupe nambari ya simu ambayo tutatumia kuwasiliana iwapo tutahitajika kufanya hivyo. Ukikubali kutupa nambari ya simu itatumiwa tu na watafiti katika utafiti huu na kamwe haitapewa mtu mwingine yeyote. Sababu yetu kuchukua nambari yako ya simu ni ili tuweze kuwasiliana nawe iwapo data itapotea.

**JE, KUNA HATARI ZOZOTE AU MADHARA YANAYOHUSISHWA NA UTAFITI HUU?**

Utafiti wa kimatibabu una uwezo wa kusababisha hatari za kisaikolojia, katika mahusiano, hisia na kimwili. Yafaa tujaribu tuwezavyo kupunguza hatari hizo. Hatari moja ambayo yaweza kutokea ni ukosefu wa siri. Yote utakayotuambia yatabaki kuwa siri.Tutatumia kodi fulani kukutambua katika tarakilishi iliyo na neno la siri. Data na nakala zetu zote tutazifungia kwa kabati. Hata hivyo, hakuna chombo cha kuhifadhi siri yako ambacho ni salama kabisa na huenda mtu akafumbua kwamba ulishiriki katika utafiti na apate habari kukuhusu.

Aidhaa kujibu maswali kwenye mahojiano huenda kukawa kugumu kwako. Iwapo kuna maswali hutaki kujibu waweza kuyaacha. Una haki ya kukataa mahojiano au swali lolote litakaloulizwa kwenye mahojiano.

Inawezekana liwe ni jambo la aibu kwako kufanyiwa uchunguzi. Tutahakikisha ya kwamba yote hayo yatafanyiwa mahali pa siri. Hali kadhalika watakaofanya mahojiano ni watu wenye weledi na ujuzi. Huenda usihisi vizuri wakati wa kukaguliwa kinywani. Pakitokea ya kwamba umejeruhiwa, umekuwa mgonjwa au shida nyingine inayohusiana na utafiti huu imetokea piga nambari utakayoona mwishoni mwa nakala hii haraka iwezekanavyo. Wahudumu watakutibu magonjwa madogo madogo au wakutume kwingineko iwapo itahitajika kufanya hivyo

**KUNA MANUFAA YOYOTE KATIKA UTAFITI HUU?**

Huenda utafaidika kwa kupata uchunguzi wa mdomo na eksrei za meno bila malipo. Tutakutuma hospitalini iwapo tutahitajika kufanya hivyo. Habari hiyo itachangia ufahamu katika sayansi na kuelewa meno yaliyojazwa na resin composite.

**JE KUWEPO KATIKA UTAFITI HUU KUTAKUGHARIMU CHOCHOTE?**

HAIHUSIKI

**UTARUDISHA PESA ZOZOTE UTAKAZOTUMIA KATIKA UTAFITI?**

Hakuna jambo lolote litakalokupelekea wewe kutumia pesa, lakini iwapo pesa zako zitumike, utaregeshewa.

**IWAPO UKUMBANE NA MASWALI SIKU ZA USONI**

Iwapo utakuwa na maswali Zaidi kuhusu utafiti huu tafadhali piga simu au utume arafa kwa nambari iliyoko mwishoni mwa nakala hii ili kuwasiliana na wahudumu wetu.

Kwa habari Zaidi kuhusu haki yako kama mshiriki wa utafiti waweza kuzungumza na katibu/Mwenye kiti, Hospitali ya Kitaifa ya Kenyatta-Kamati ya maadili na utafiti Chuo Kikuu cha Nairobi, Nambari ya simu 2726300 Ext. 44102 Barua pepe: uonknherc@uonbi.ac.ke.

Wahudumu watakulipa hela zako ukishatumia nambari hizi iwapo mawasiliano yatahusu utafiti

.

**CHAGUO LAKO LINGINE NI LIPI?**

Uamuzi wako wa kushiriki katika utafiti huu ni wa hiari. Una ruhusa ya kukataa kushiriki katika utafiti na waweza kujiondoa katika utafiti bila hasara yoyote na bila kukiukwa kwa haki yako.

**FOMU YA RIDHAA**

**Kauli ya mshiriki**

Nimeisoma fomu hii ya ridhaa ama nimesomewa ujumbe. Nilipata fursa ya kujadiliana kuhusu utafiti huu na mtafiti. Maswali yangu yamejibiwa kwa lugha ambayo naielewa. Nimeelezewa manufaa na hatari ziliwepo. Naelewa kuwa ushiriki wangu kwa utafiti huu ni wa hiari na naweza kujiondoawa wakati wowote. Nimekubali kwa hiari kushiriki katika utafiti huu.

Naelewa juhudi zitafanywa ili kuuhifadhi habari yangu wa kibinafsi.

Kwa kutia sahihi fomu hii ya ridhaa, sijaiacha haki zangu kisheria kama mshiriki katika utafiti.

**Nimekubali kushiriki katika utafiti huu: Ndio La**

Nimekubali kupigwa eksirei ya mdomo: Ndio La

Nimekubali kupeana nambari za simu ili nifuatiliwe: Ndio La

Jina la mshiriki lililochapishwa: __________________________________________

**Sahihi ya mshiriki / alama ya kidole** __________________**Tarehe** _________

**Kauli ya mtafiti**

Mimi, ambaye nimetia sahihi, nimetoa maelezo kamili kuhusiana na utafiti huu kwa mshiriki ambaye ametajwa hapo juuna naamini ya kwamba mshiriki ameelewa na akatoa ridhaa yake kwa hiari.

**Jina la mtafiti**: Dr. Umaru Kizito **Tarehe**: ____________

**Sahihi** ______________________________________________________________

**Kazi yake katika utafiti**: Mkuu wa uchunguzi

Kwa habari zaidi zungumza na.

1. Dr. Umaru Kizito

Shule ya kisayansi ya meno, Chuo Kikuu Cha Nairobi, Nambari ya simu: 0702140469. Email: [drkizitoumaru@gmail.com](mailto:drkizitoumaru@gmail.com)

Msimamizi mkuu

1. Dr Bernina K Kisumbi

Shule ya kisayansi ya meno, Chuo Kikuu Cha Nairobi

Nambari ya simu: 0722487096 Email: [bkisumbi@uonbi.ac.ke](mailto:bkisumbi@uonbi.ac.ke)

1. Dr Hazel O Simila

Shule ya kisayansi ya meno, Chuo Kikuu Cha Nairobi,

Nambari ya simu: 0721616044 Email: [simila@uonbi.ac.ke](mailto:simila@uonbi.ac.ke)

1. Dr Fred Otieno

Shule ya kisayansi ya meno, Chuo Kikuu Cha Nairobi

Nambari ya simu: 0722521010 Email: [fred.otieno@uonbi.ac.ke](mailto:fred.otieno@uonbi.ac.ke)

Katibu/ Mwenyekiti,

Hospitali ya Kitaifa ya Kenyatta-Kamati ya maadili na utafiti Chuo Kikuu Cha Nairobi,

Nambari ya simu. (254-020) 2726300-9 Barua pepel: [uonknh_erc@uonbi.ac.ke](mailto:uonknh_erc@uonbi.ac.ke).

Kutoka sawa mbili mpaka sawa kumi na moja, juma moja mpaka juna tano.
