# Supplementary material for: Retrospective Evaluation of the Clinical Status of Direct Posterior Composite Restorations in Selected Institutions in Nairobi, Kenya
Source: Research Square preprint supplement (doi:10.21203/rs.3.rs-7991828/v1), 2025-12-22
Supplement: Supplementary file 5 [file bee5fd70054f362ac9bae481.docx]

APPENDIX I: QUESTIONNAIRE

1. Age: ……………………
2. Gender: …………………....
3. Occupation: …………………….
4. Highest level of education attained
   1. Primary school 
   2. Secondary school 
   3. Tertiary level 
5. Do you use the following oral hygiene aids?
   - 1. Dental floss 
     2. Tooth brush 
6. How often do you brush your teeth?
   1. Once a day 
   2. Twice a day 
   3. More than twice a day 

Please specify if answer is 3…………………………

1. How often do you visit a dentist?
   1. Annually 
   2. Twice a year 
   3. Bi-annually 
   4. On need basis 
2. Do you suffer from any of the following chronic illnesses?
   1. Diabetes mellitus 
   2. Heart disease 
   3. Hypertension 
   4. Other……………………….
3. Do you grind your teeth at night?
   1. Yes
   2. No
4. How would rate your overall satisfaction with the white restorations placed in your mouth
   1. Unsatisfied
   2. Not satisfied
   3. Satisfied
   4. Very satisfied
5. Length of time you have had this restoration/s …………………….
