# Supplementary figures and images for: Retrospective Evaluation of the Clinical Status of Direct Posterior Composite Restorations in Selected Institutions in Nairobi, Kenya
Source: Research Square preprint supplement (doi:10.21203/rs.3.rs-7991828/v1), 2025-12-22

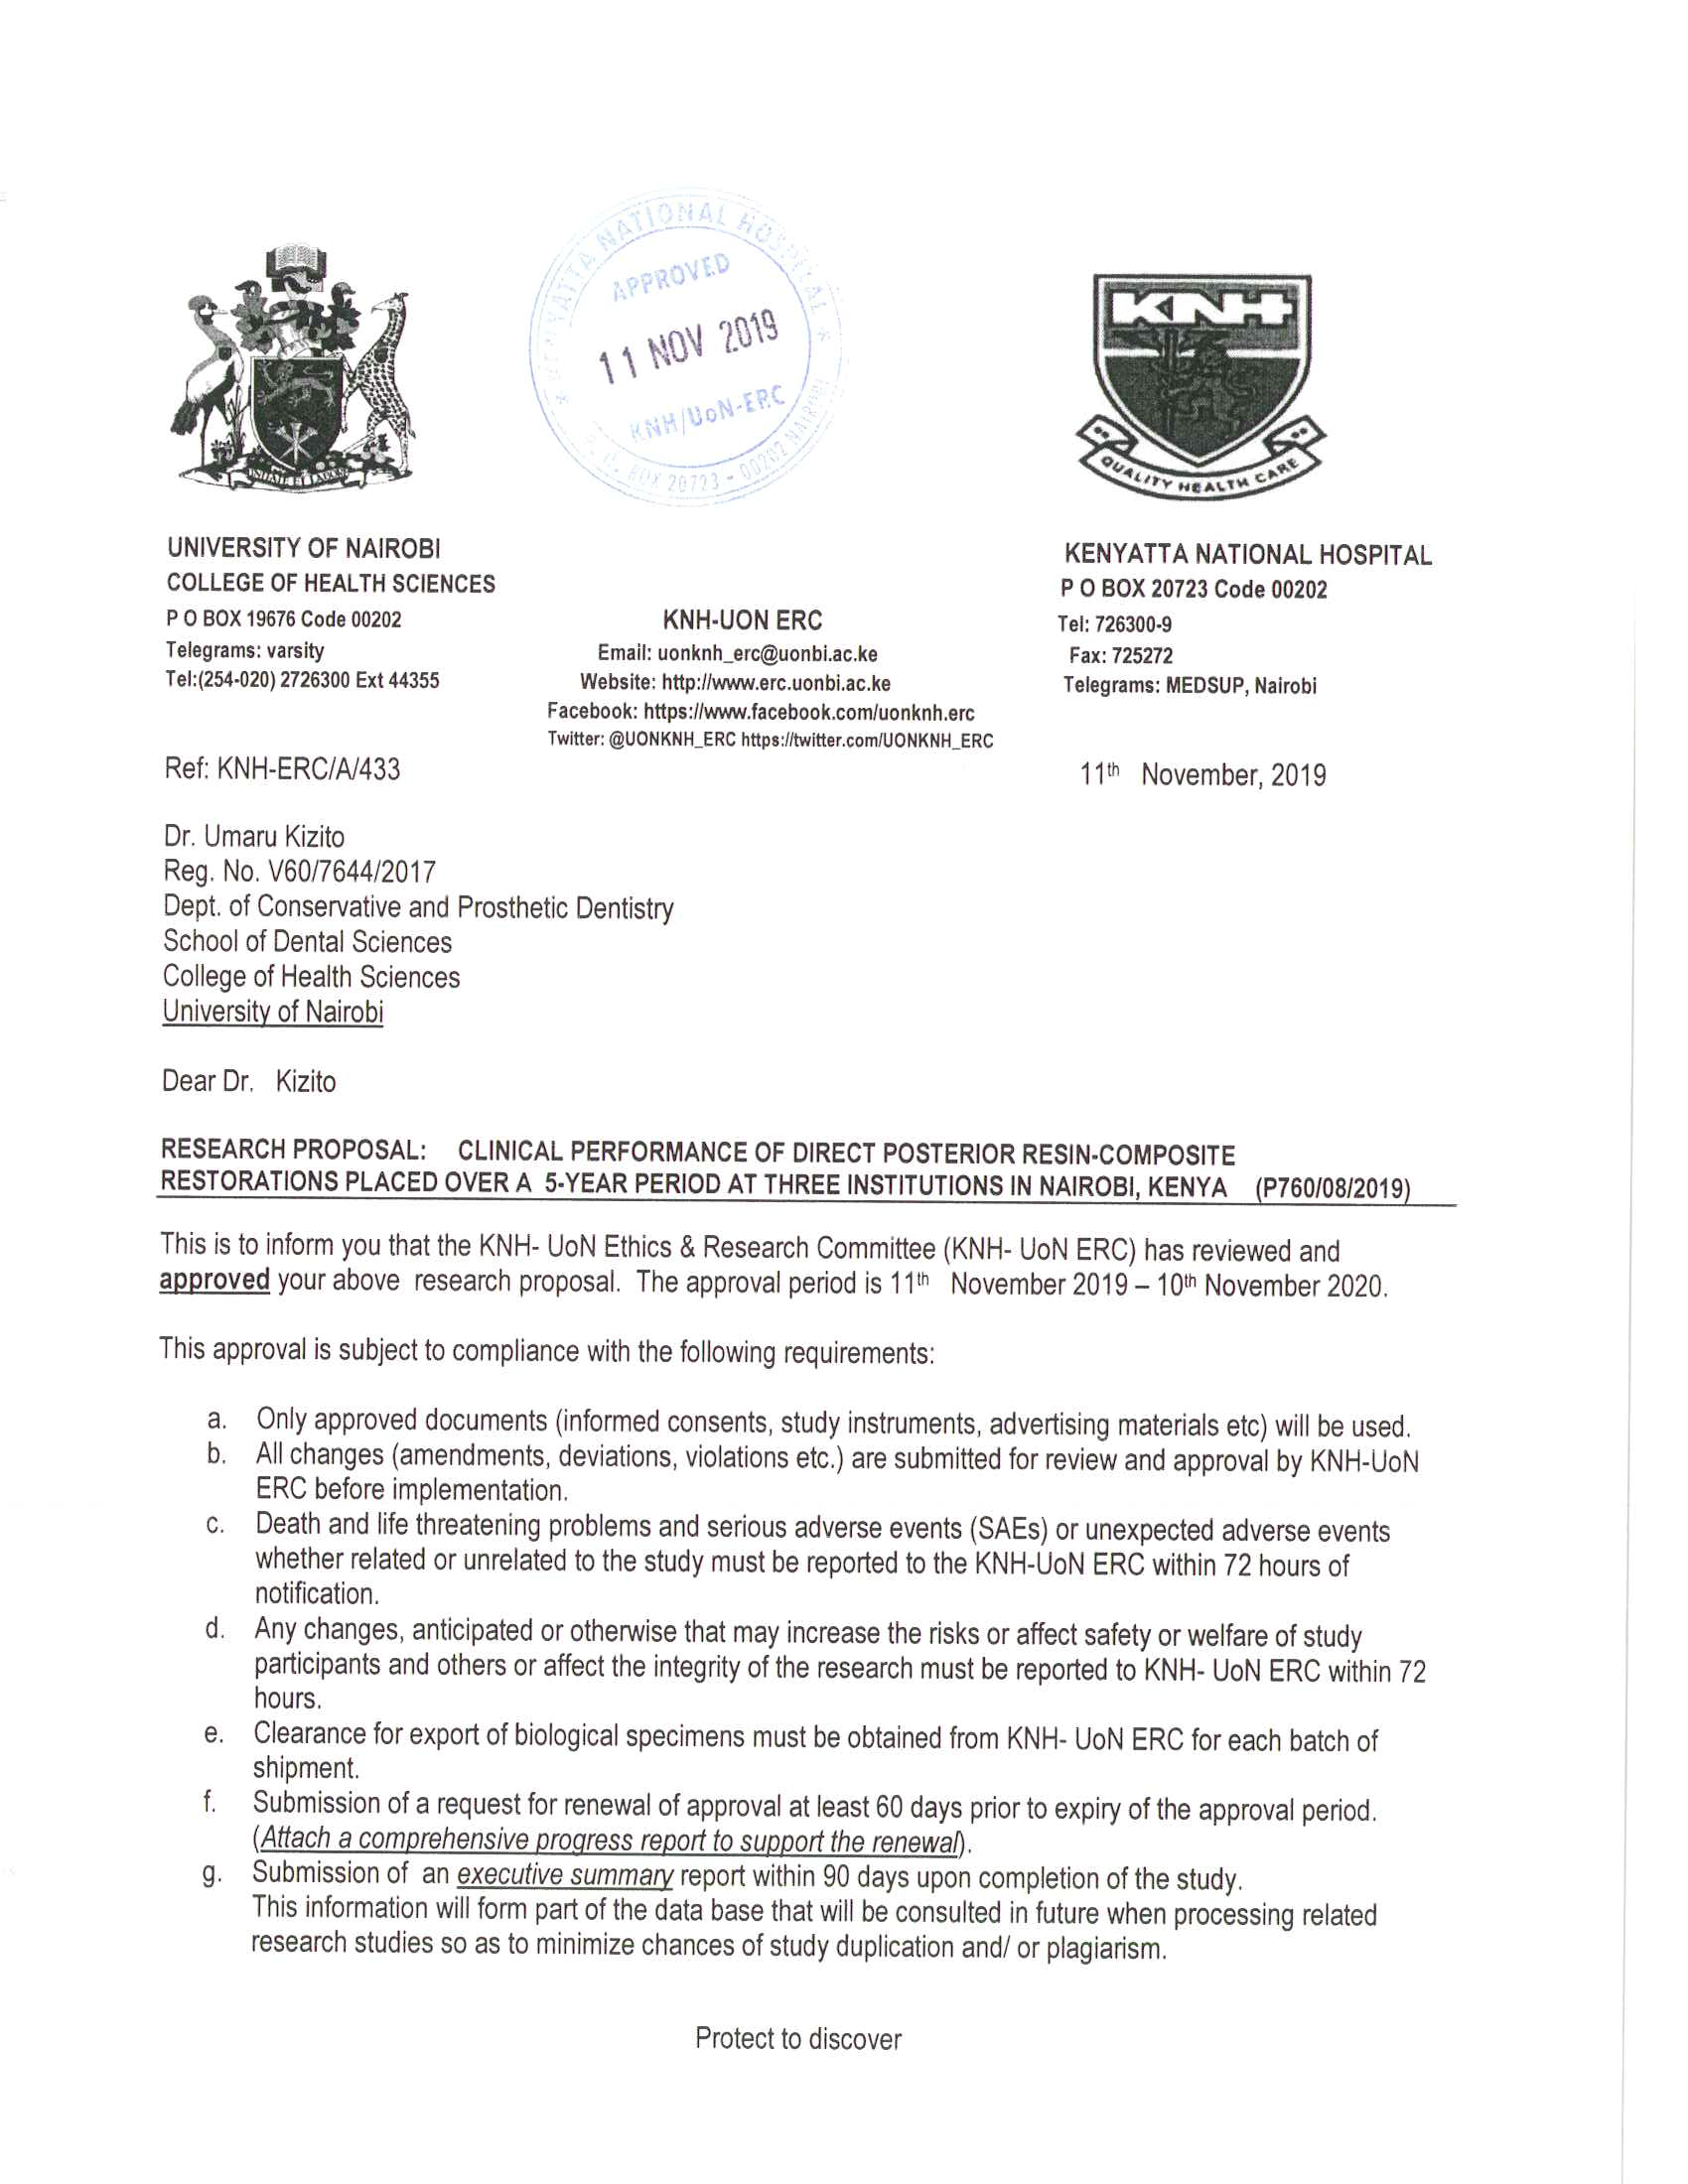


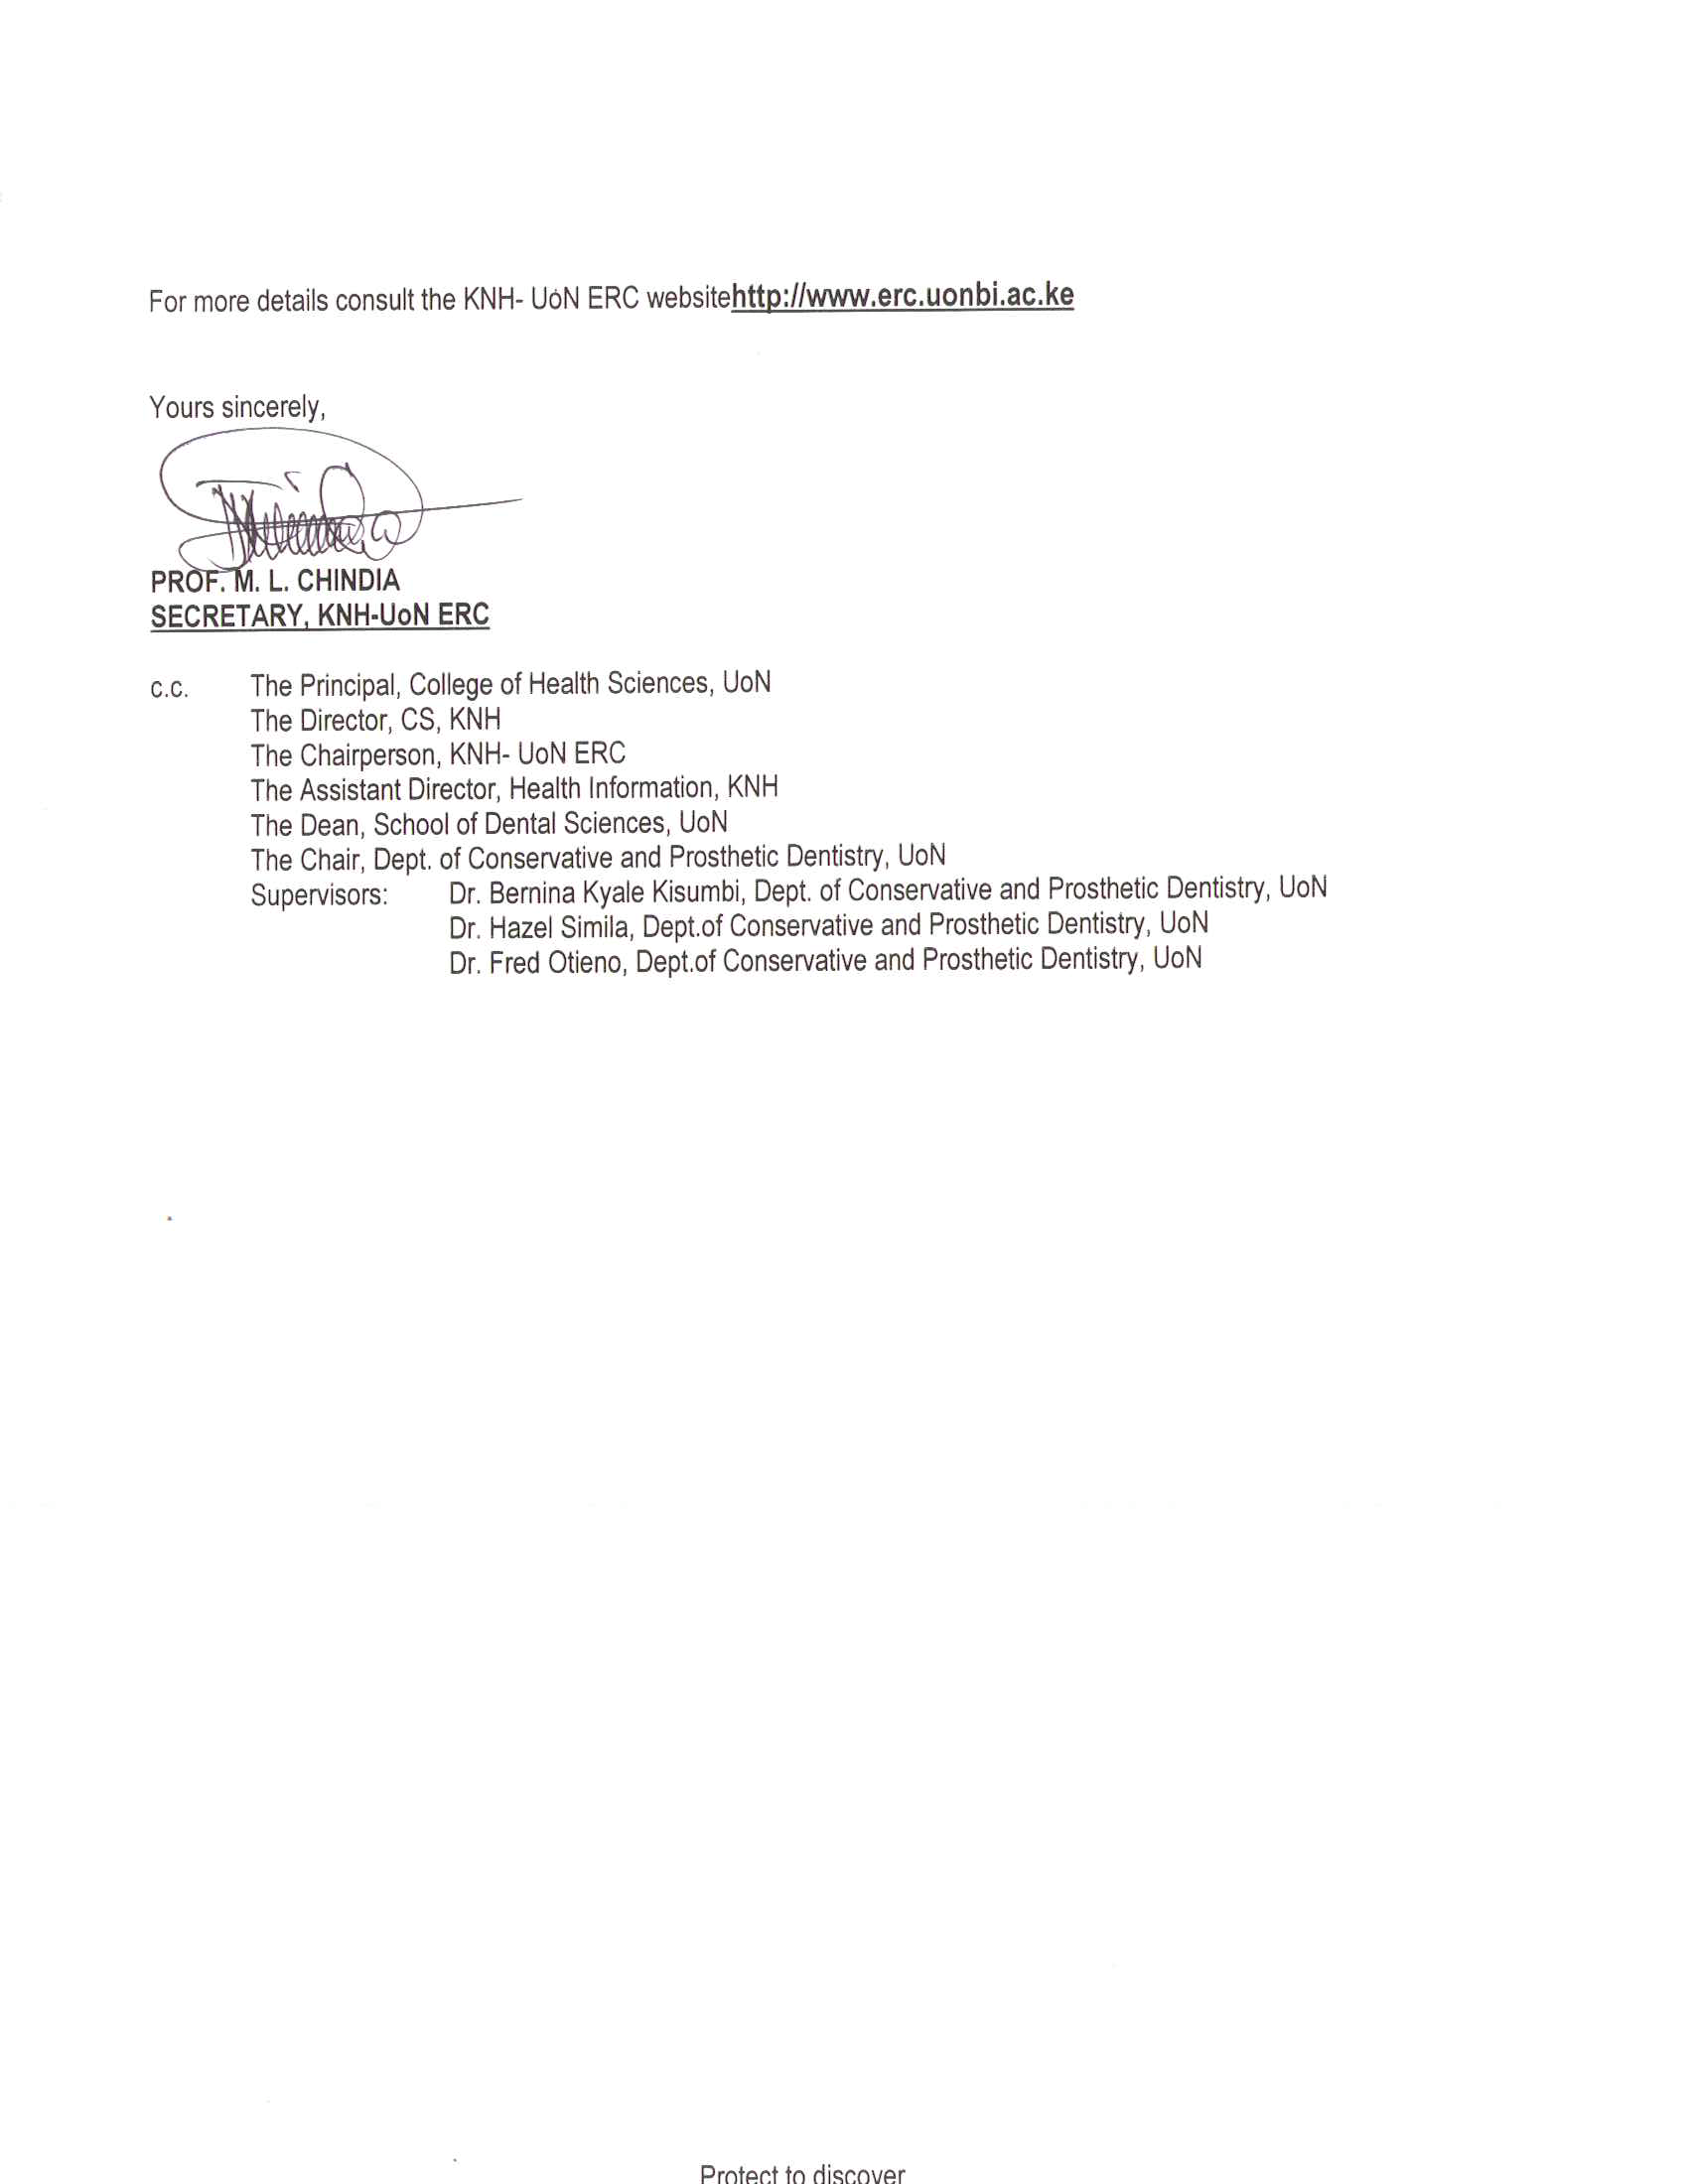

Supplement: Supplementary file 6 [file d5398592b7aef72485bd87c4.docx]
